# Supplementary material for: Quantifying the factors limiting rate performance in battery electrodes
Source: PubMed Central journal article supplement (PMC6488605; doi:10.1038/s41467-019-09792-9), 2019-04-29
Supplement: 41467_2019_9792_MOESM1_ESM.pdf [file 41467_2019_9792_MOESM1_ESM.pdf]

Supplementary Information for

**Quantifying the factors limiting rate-performance in battery electrodes**

Ruiyuan Tian *et al.*

## Supplementary Figures

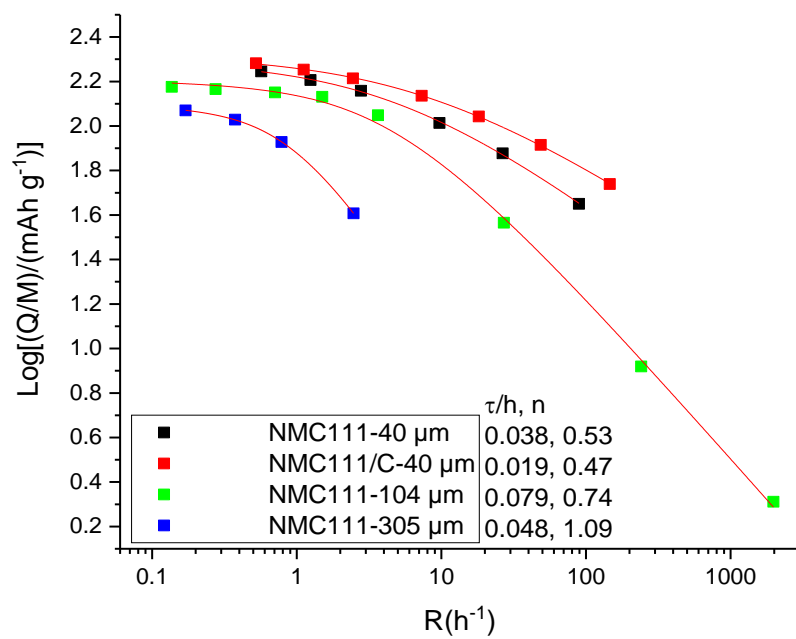

Supplementary Figure 1. NMC111 fits. (Supplementary Table 2, row 1-3)

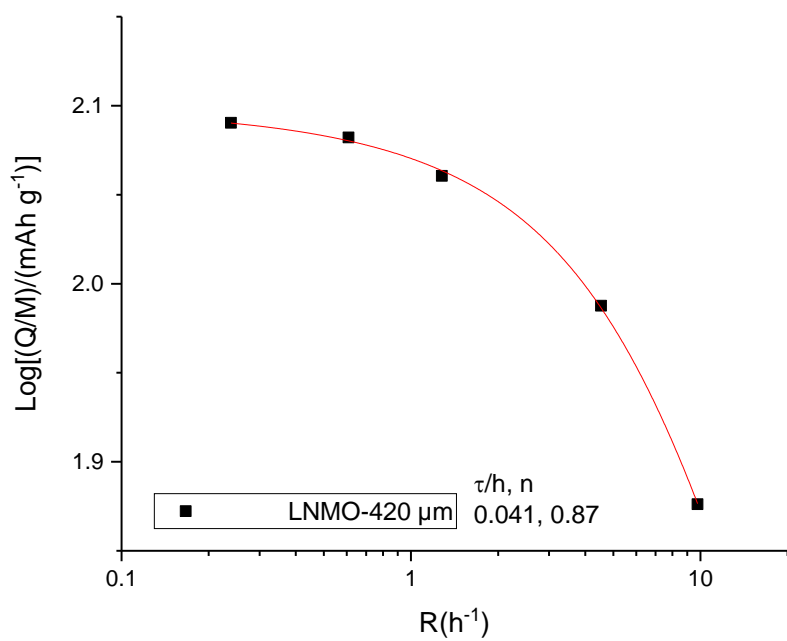

**Supplementary Figure 2.** LiNi<sub>0.5</sub>Mn<sub>1.5</sub>O<sub>4</sub>-fits. (Supplementary Table 2, row 4)

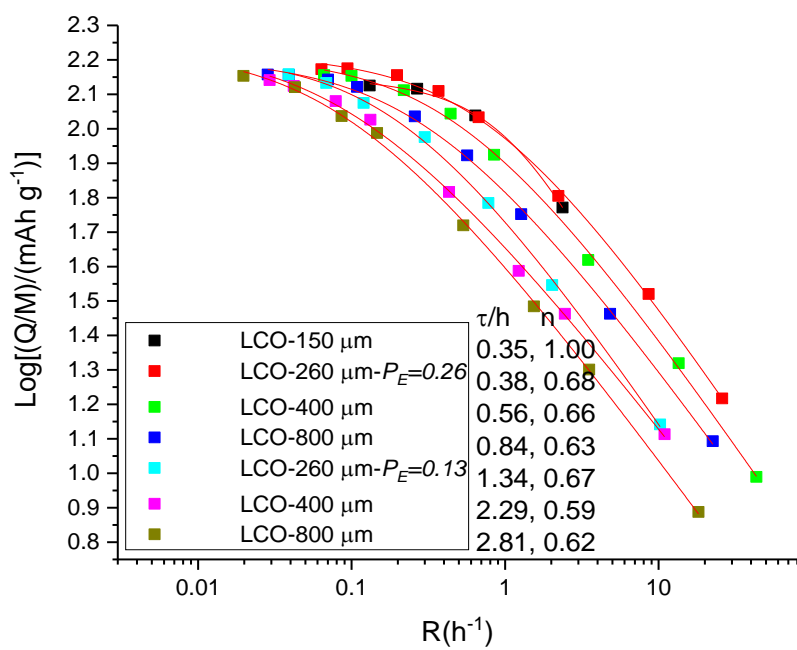

**Supplementary Figure 3.** LiCoO<sub>2</sub> fits. (Supplementary Table 2, row 5–6)

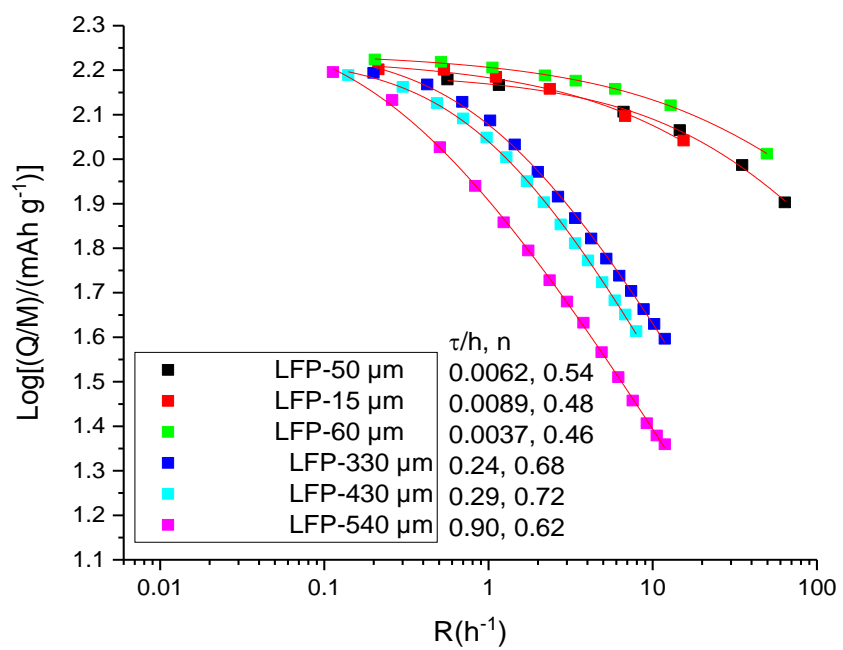

**Supplementary Figure 4.** LiFePO<sub>4</sub> fits. (Supplementary Table 2, row 7–10)

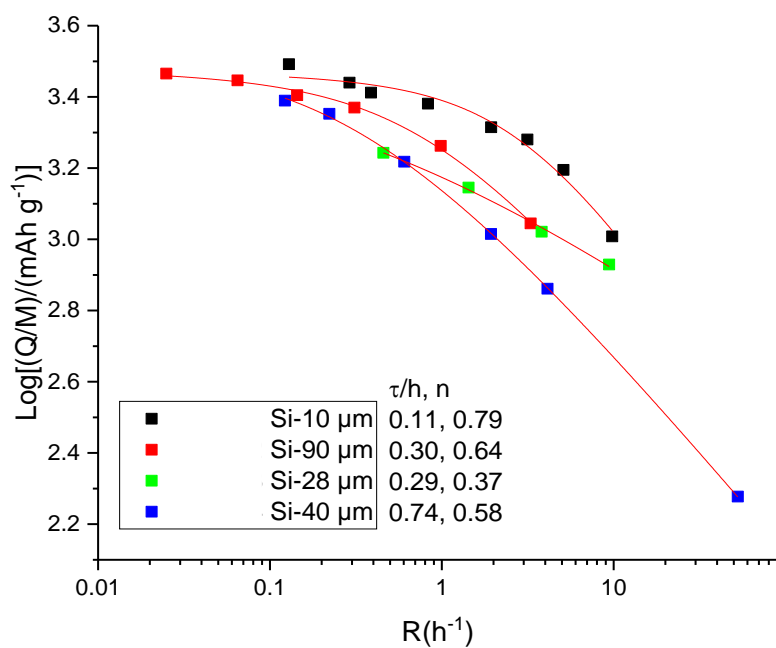

**Supplementary Figure 5.** Si fits. (Supplementary Table 2, row 11–14)

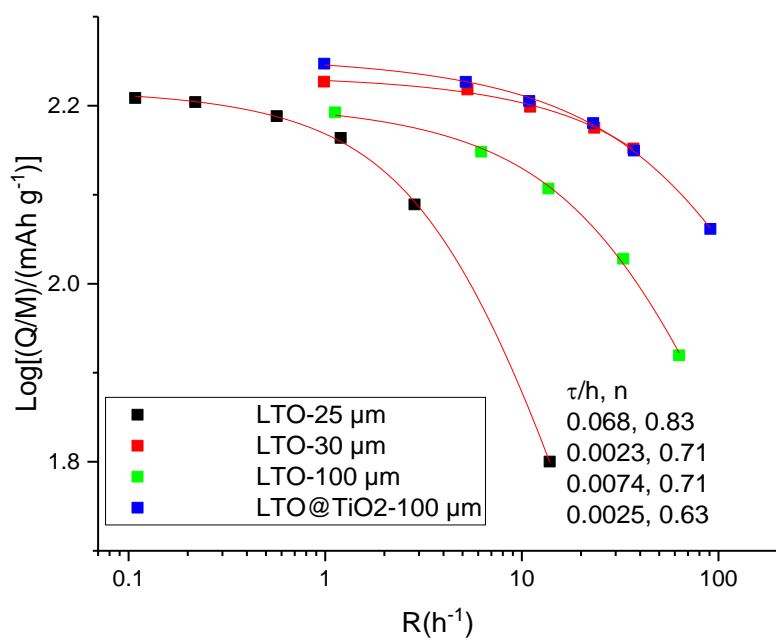

**Supplementary Figure 6.**  $\text{Li}_4\text{Ti}_5\text{O}_{12}$  fits. (Supplementary Table 2, row 15–17)

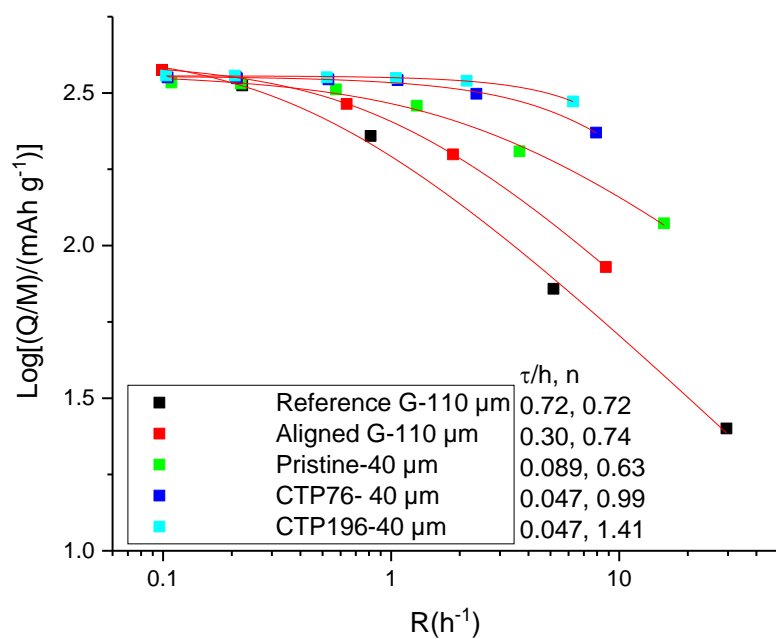

**Supplementary Figure 7.** Graphite fits. (Supplementary Table 2, row 18–19)



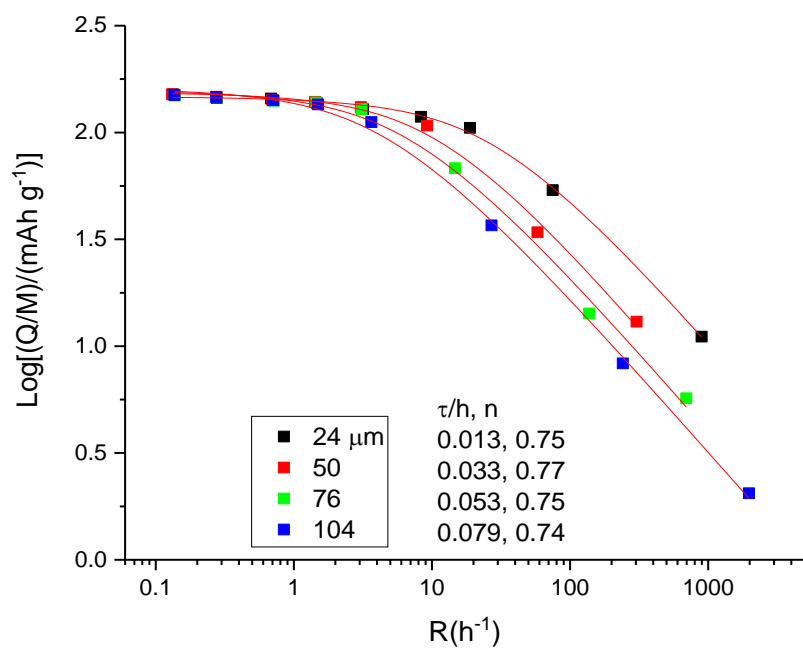

**Supplementary Figure 8.** NMC fits. (Supplementary Table 3, row 1)

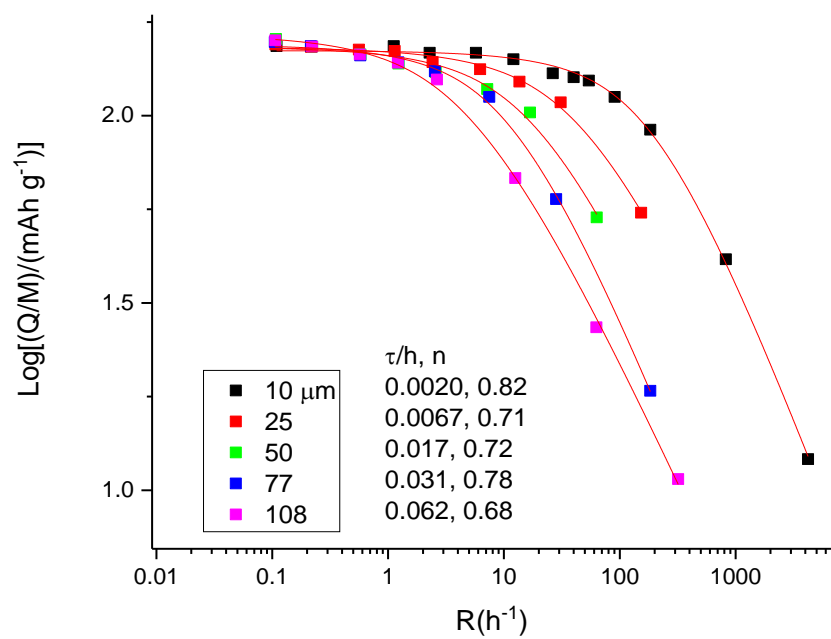

**Supplementary Figure 9.** LFP fits. (Supplementary Table 3, row 1)

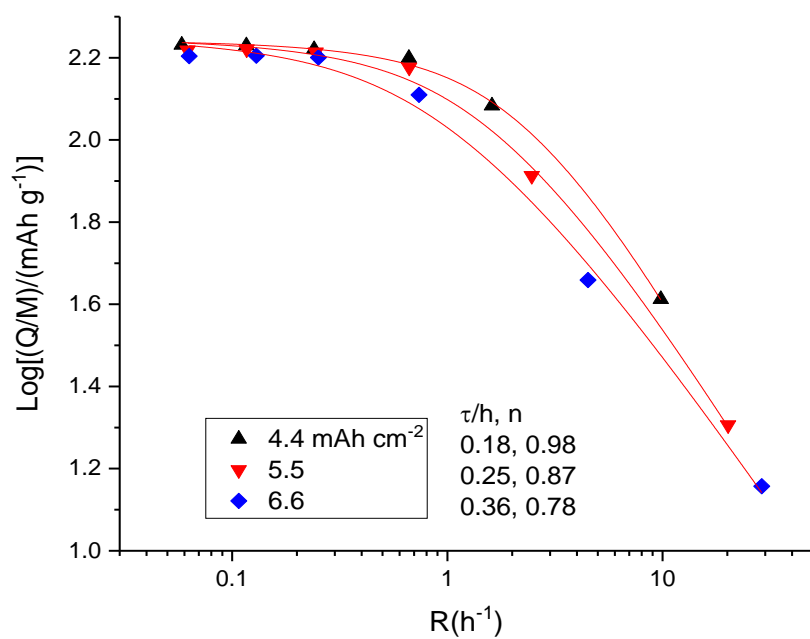

**Supplementary Figure 10.** Graphite/NMC full cell. N.B. The data sets associated with the two thinnest electrodes displayed very little change in Q/M with R leading to unreliable fits. (Supplementary Table 3, row 2)

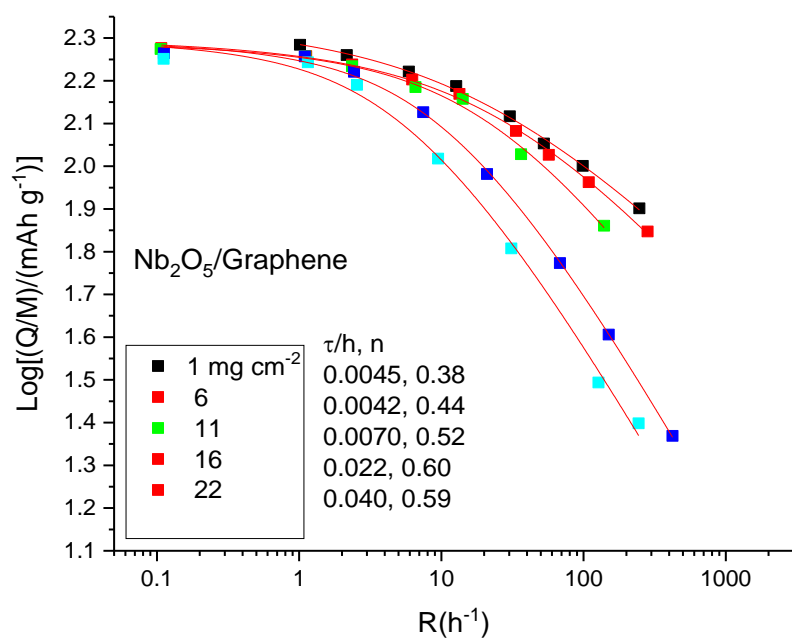

**Supplementary Figure 11.** Niobia/graphene fits. (Supplementary Table 3, row 3)

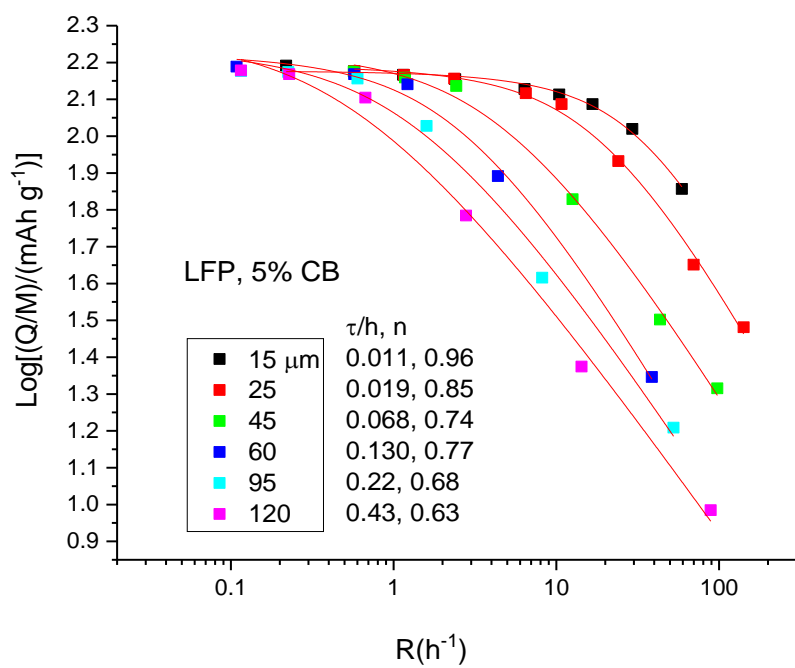

**Supplementary Figure 12.** LFP, 5% AB (acetylene black) fits. (Supplementary Table 3, row 4)

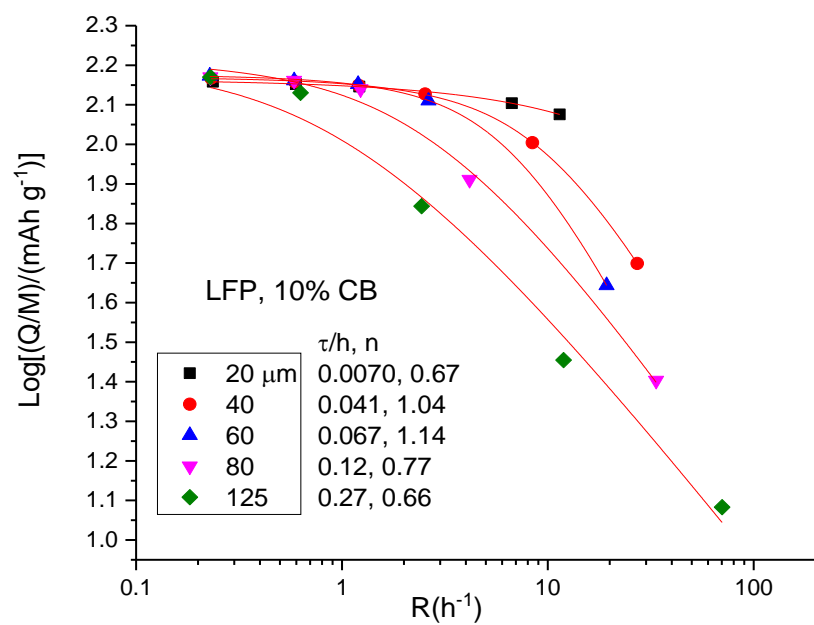

**Supplementary Figure 13.** LFP, 10% CB (acetylene black) fits. (Supplementary Table 3, row 4)

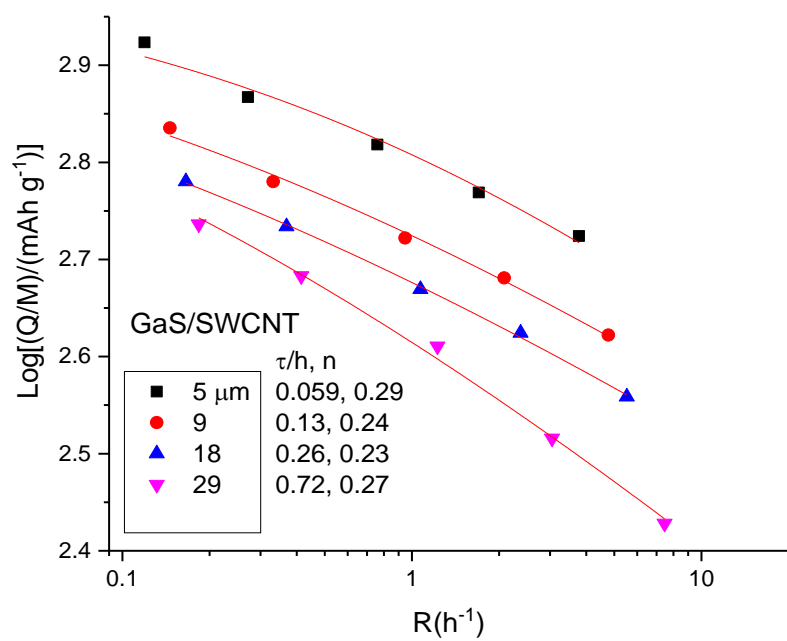

**Supplementary Figure 14.** GaS/SWCNT fits. (Supplementary Table 3, row 5)

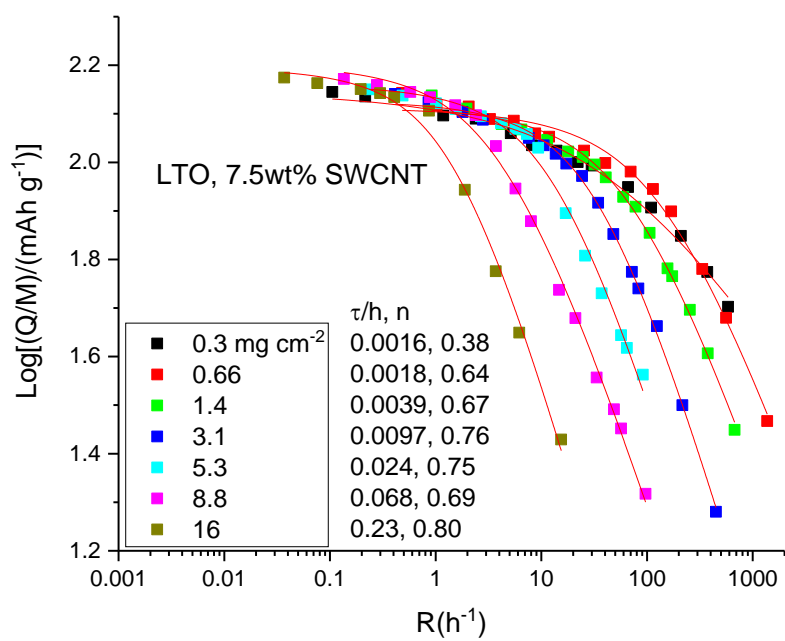

**Supplementary Figure 15.** This work, LTO/SWCNT (7.5%), fits. (Supplementary Table 3, row 6)



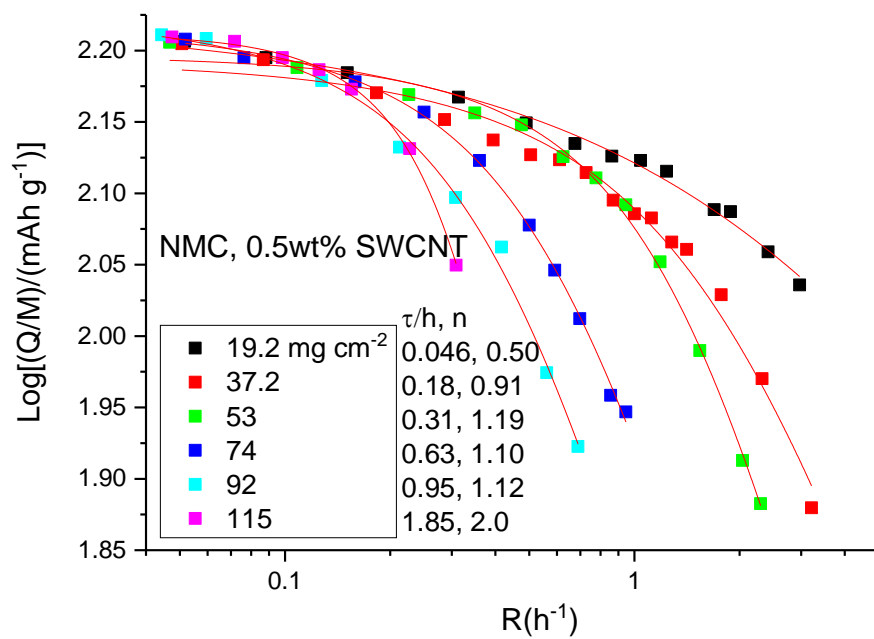

**Supplementary Figure 16.** This work, NMC/SWCNT (0.5%). (Supplementary Table 3, row 7)

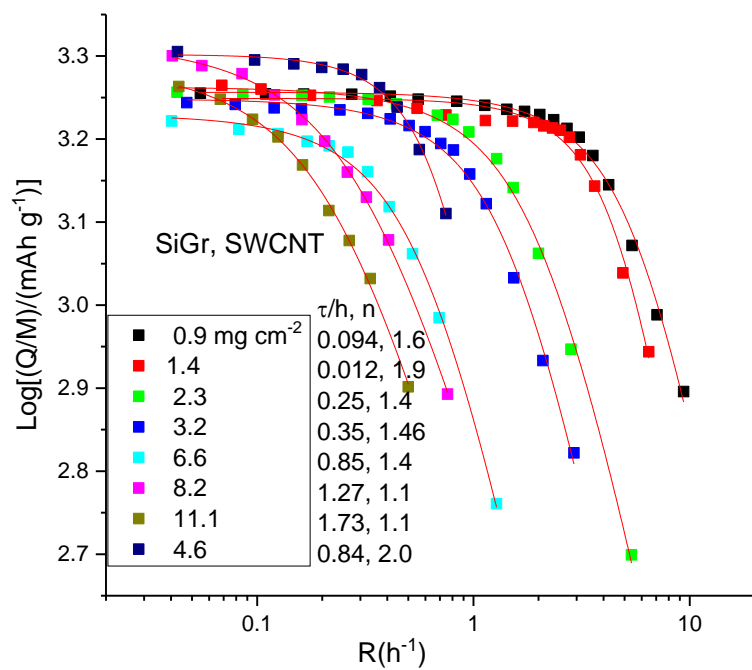

**Supplementary Figure 17.** This work, SiGr/SWCNT. (Supplementary Table 3, row 8)

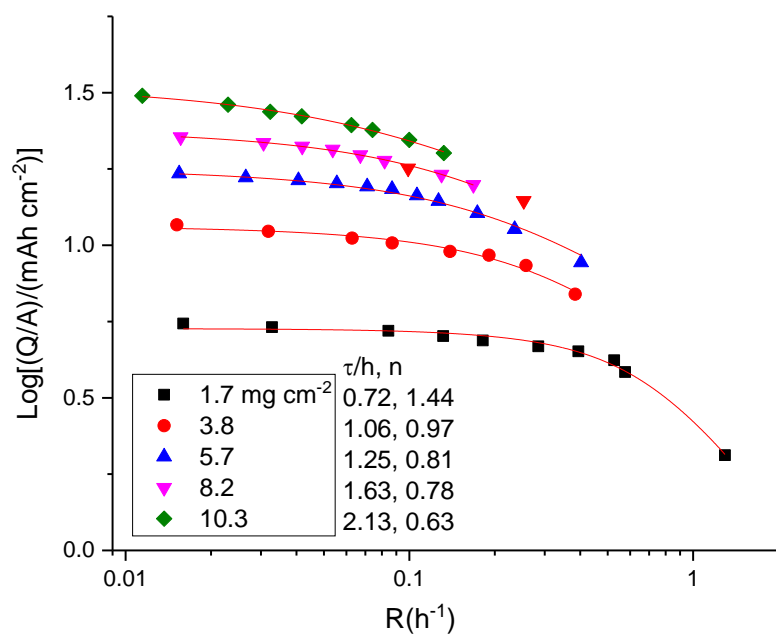

**Supplementary Figure 18.** This work, micron-Si/SWCNT. (Supplementary Table 3, row 9)

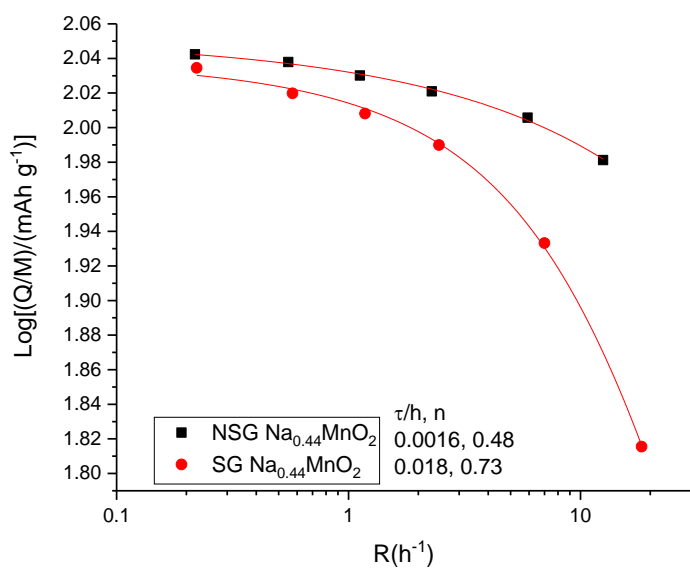

**Supplementary Figure 19.** Na<sub>0.44</sub>MnO<sub>2</sub> fits. (Supplementary Table 4, row 1)

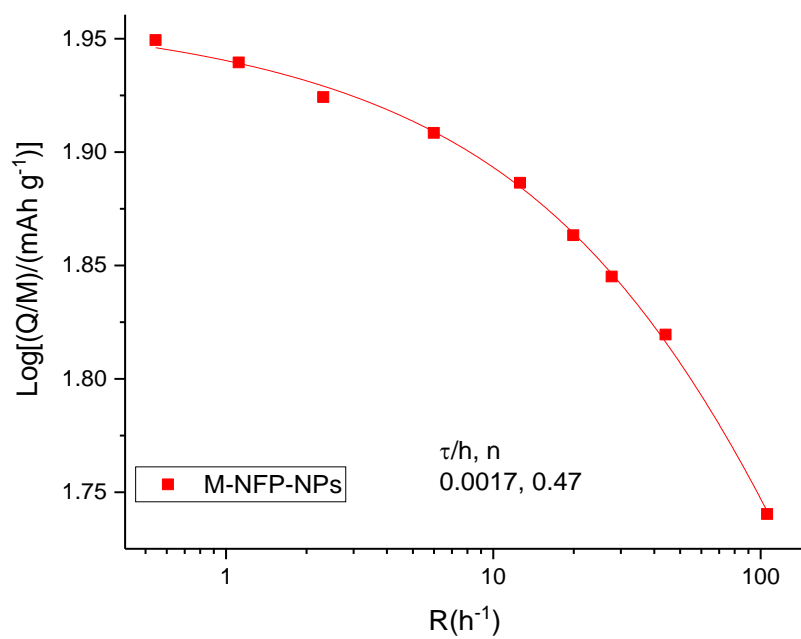

**Supplementary Figure 20.** Na<sub>2</sub>FeP<sub>2</sub>O<sub>7</sub> fits. (Supplementary Table 4, row 2)

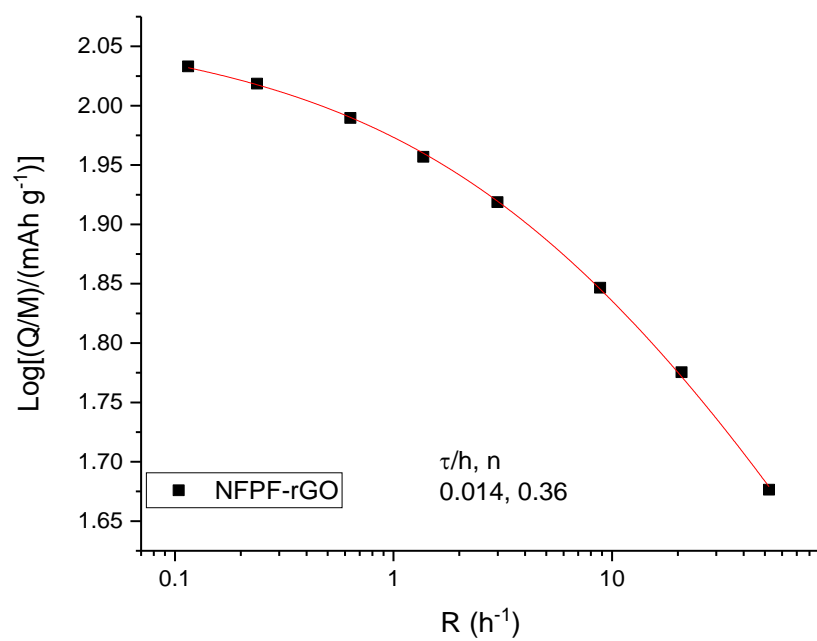

**Supplementary Figure 21.** Na<sub>2</sub>FePO<sub>4</sub>F fits. (Supplementary Table 4, row 3)

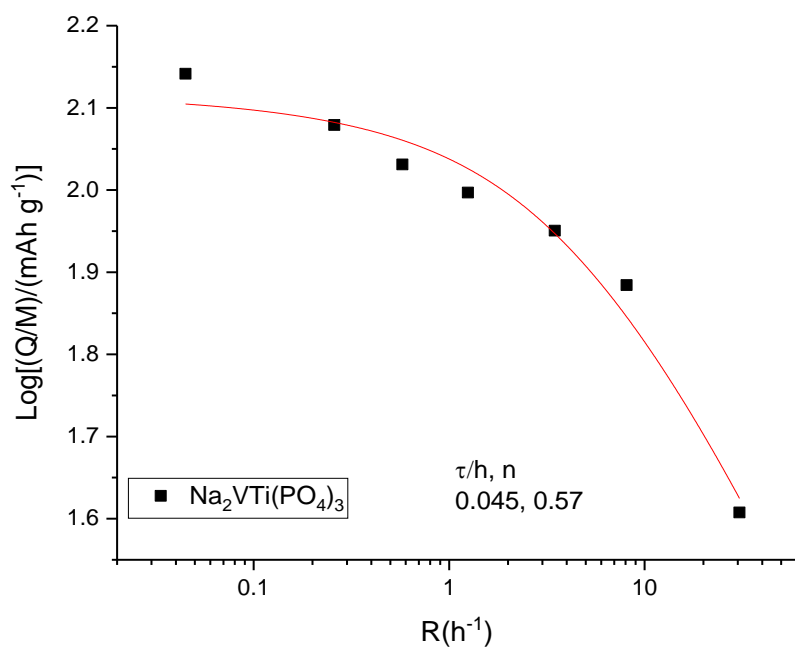

**Supplementary Figure 22.** Na<sub>2</sub>VTi(PO<sub>4</sub>)<sub>3</sub> fits. (Supplementary Table 4, row 4)

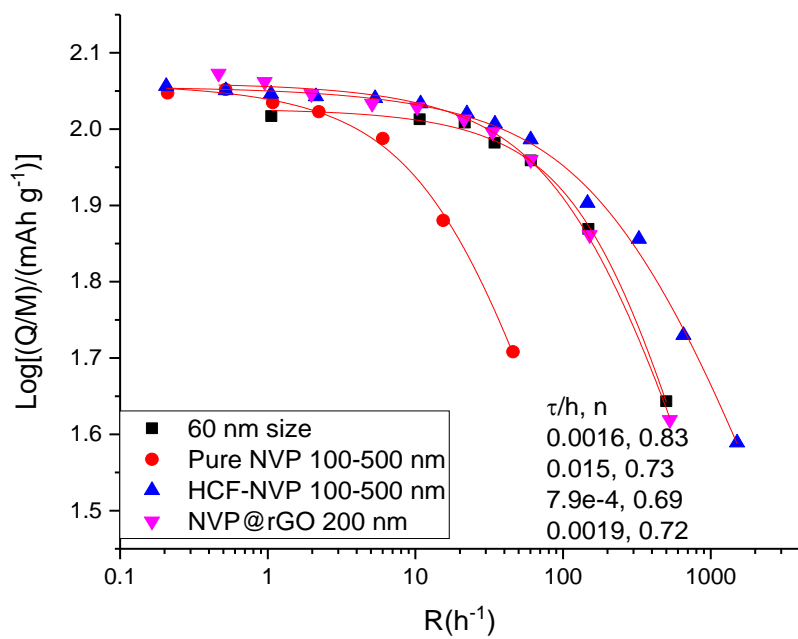

**Supplementary Figure 23.**  $\text{Na}_3\text{V}_2(\text{PO}_4)_3$  fits. (Supplementary Table 4, row 5–7)



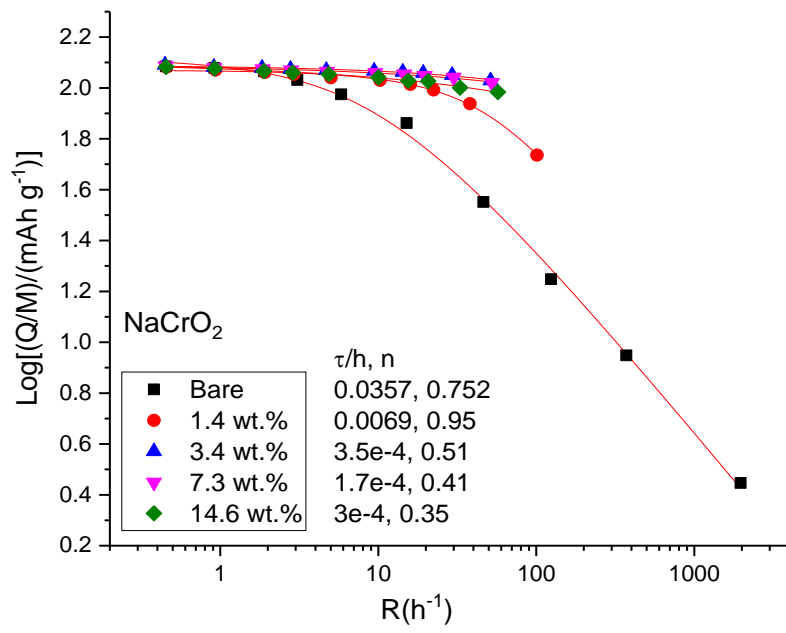

**Supplementary Figure 24.** NaCrO<sub>2</sub>/C fits. (Supplementary Table 4, row 8)

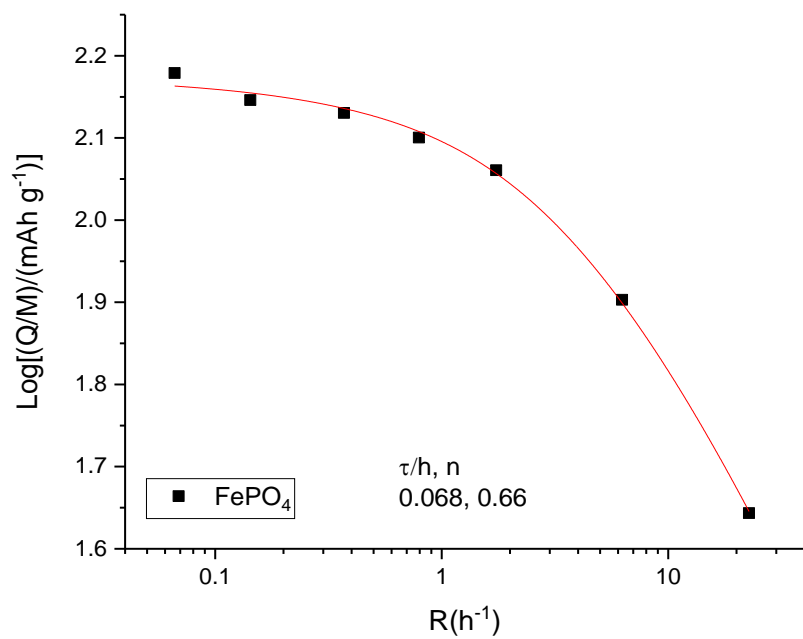

**Supplementary Figure 25.** FePO<sub>4</sub> fits. (Supplementary Table 4, row 9)

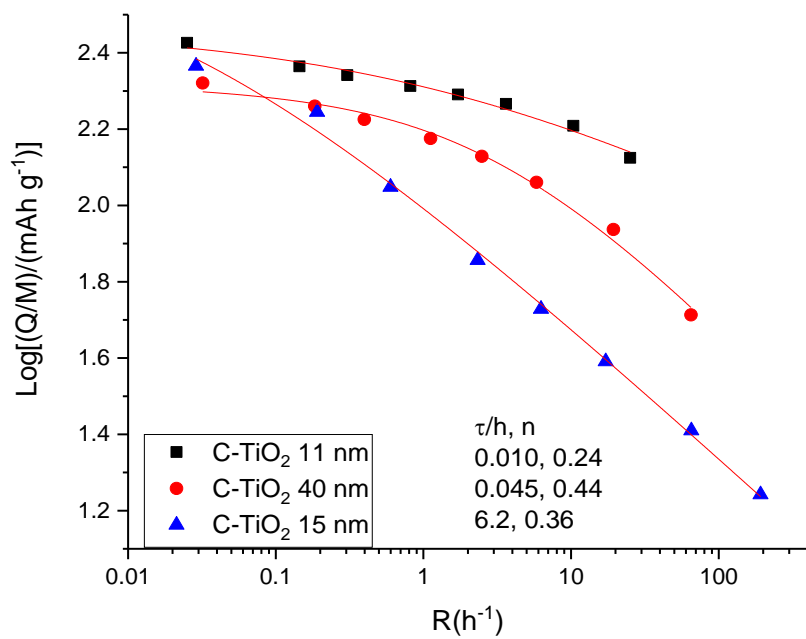

**Supplementary Figure 26.** TiO<sub>2</sub> fits. (Supplementary Table 4, row 10)

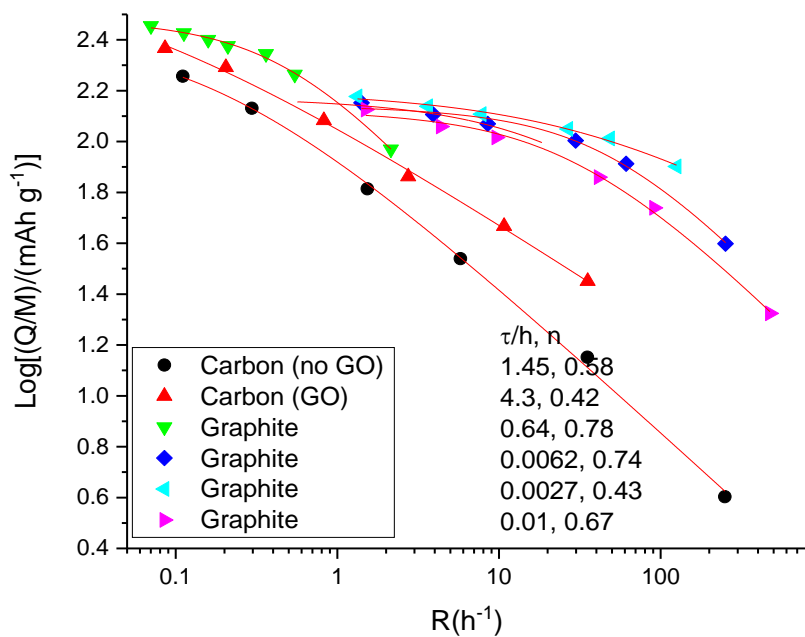

**Supplementary Figure 27.** Carbon/Graphite fits. (Supplementary Table 4, row 11–13)

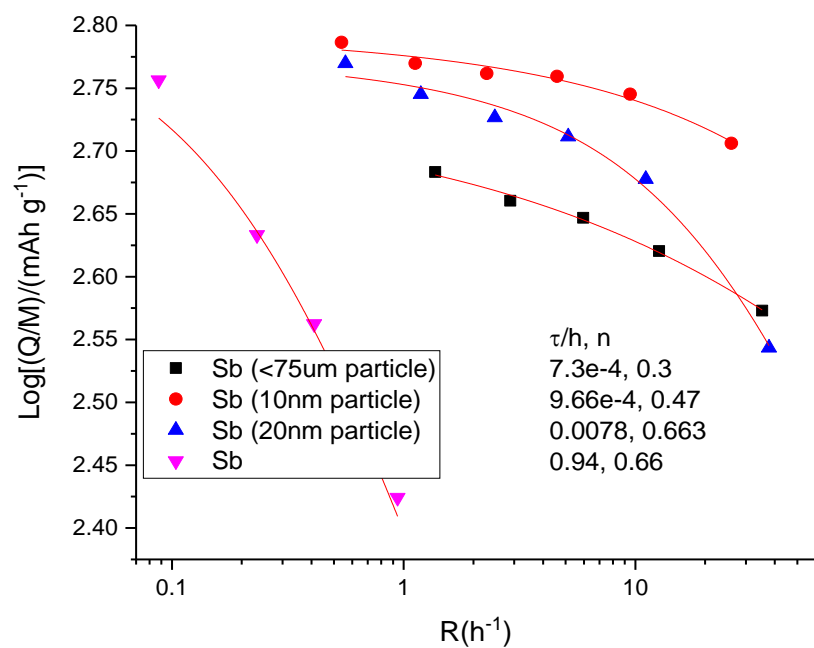

**Supplementary Figure 28.** Sb fits. (Supplementary Table 4, row 14–15)

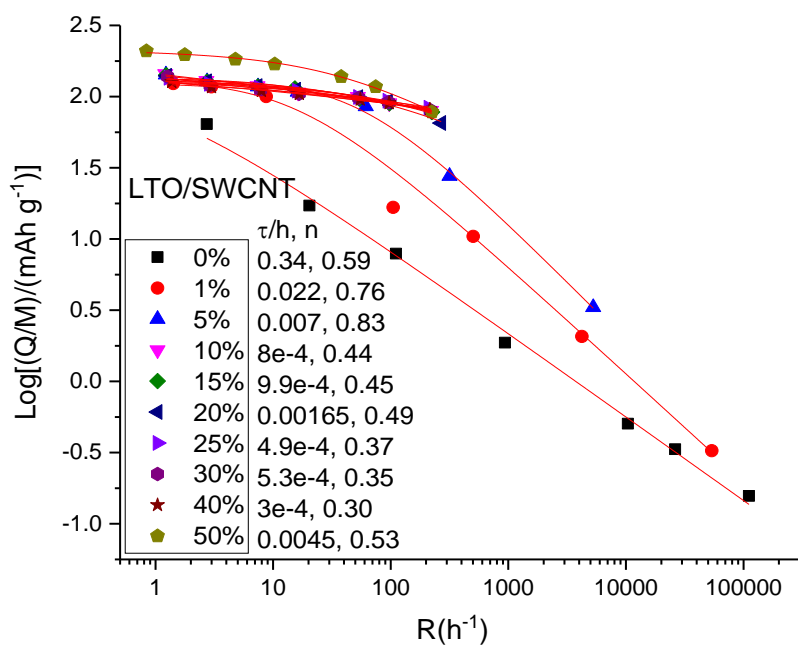

Supplementary Figure 29. LTO/SWCNT fits. (Supplementary Table 5, row 1)

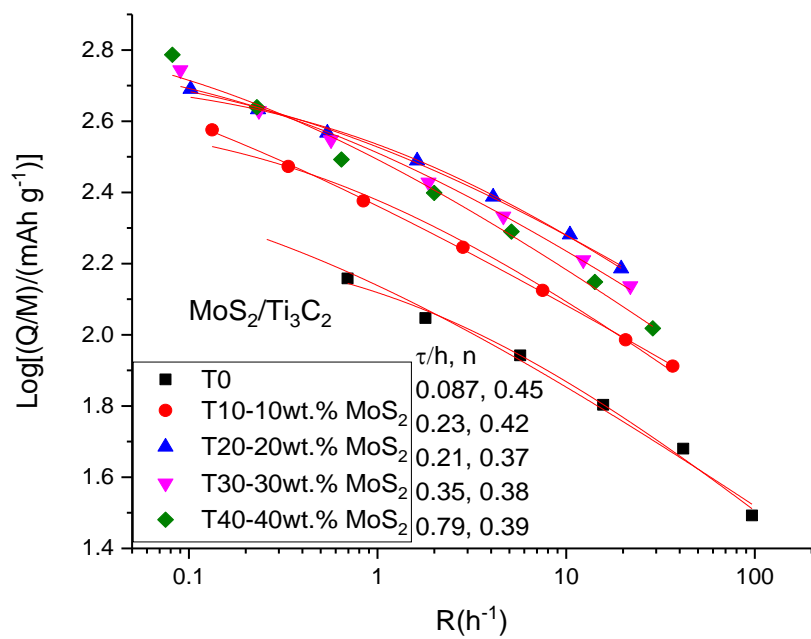

Supplementary Figure 30. LTO/SWCNT fits. (Supplementary Table 5, row 2)

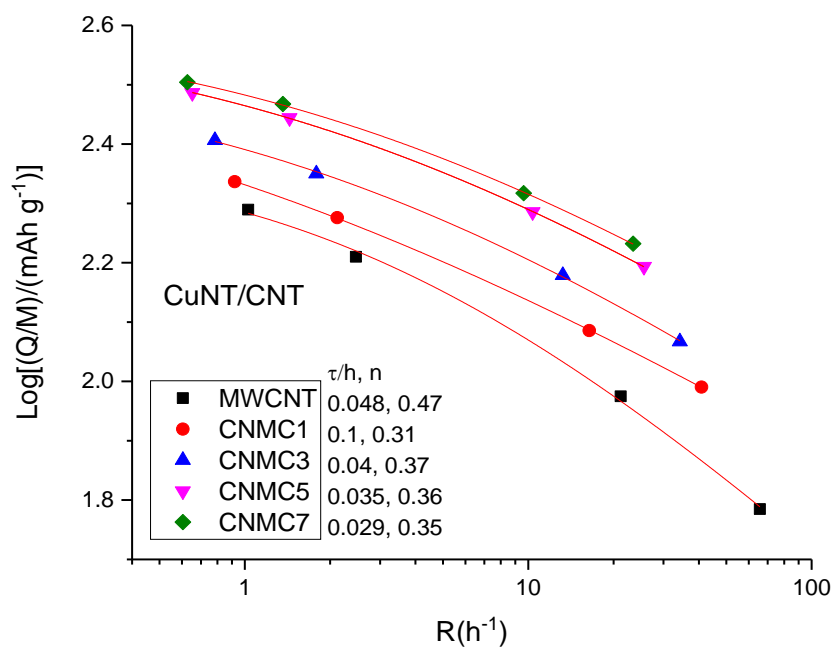

**Supplementary Figure 31.** CuNT/CNT fits. (Supplementary Table 5, row 3)



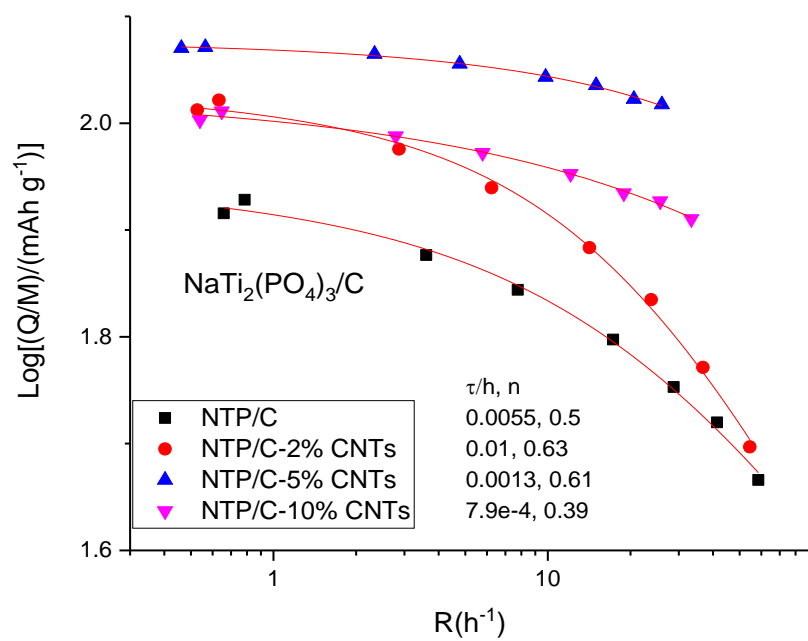

**Supplementary Figure 32.** NaTi<sub>2</sub>(PO<sub>4</sub>)<sub>3</sub>/C fits. (Supplementary Table 5, row 4)

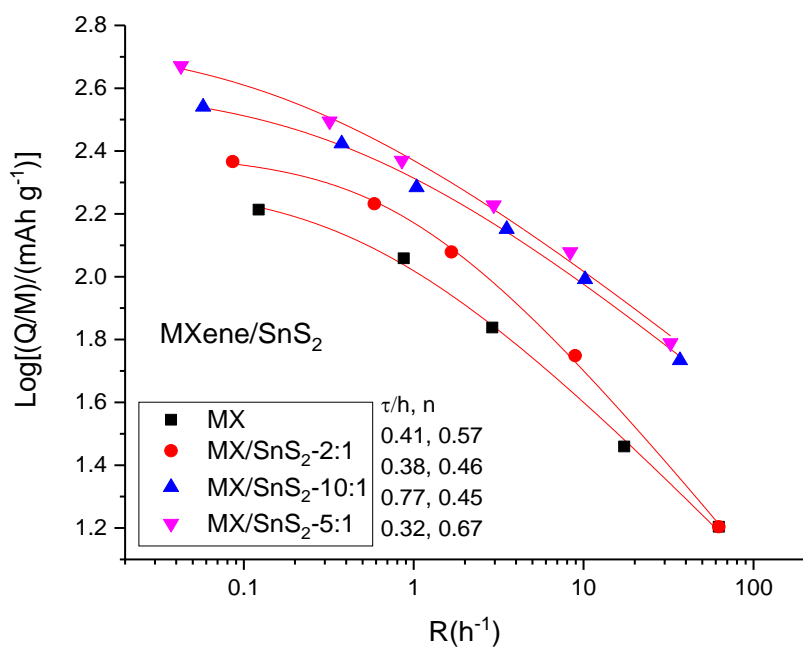

**Supplementary Figure 33.** MXene/SnS<sub>2</sub> fits. (Supplementary Table 5, row 5)

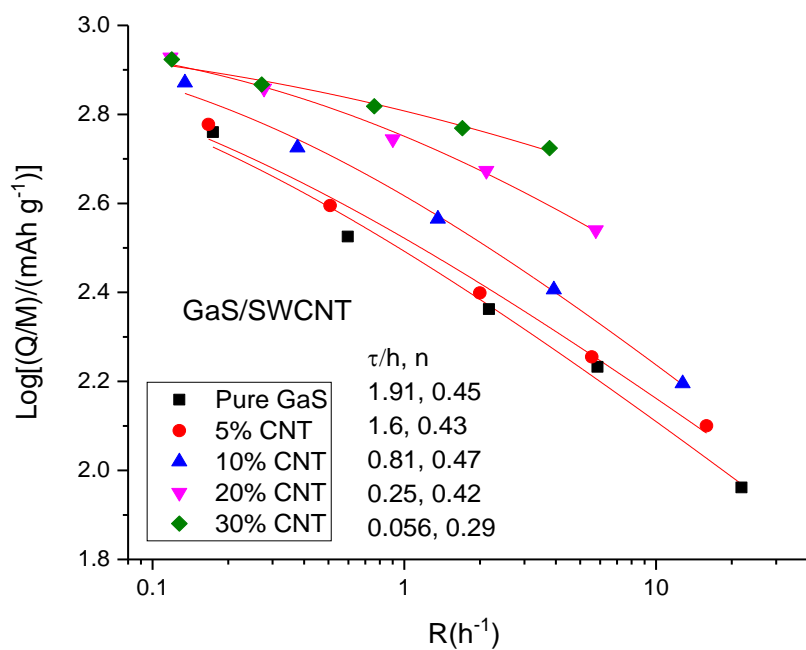

**Supplementary Figure 34.** GaS/SWCNT fits. (Supplementary Table 5, row 6)

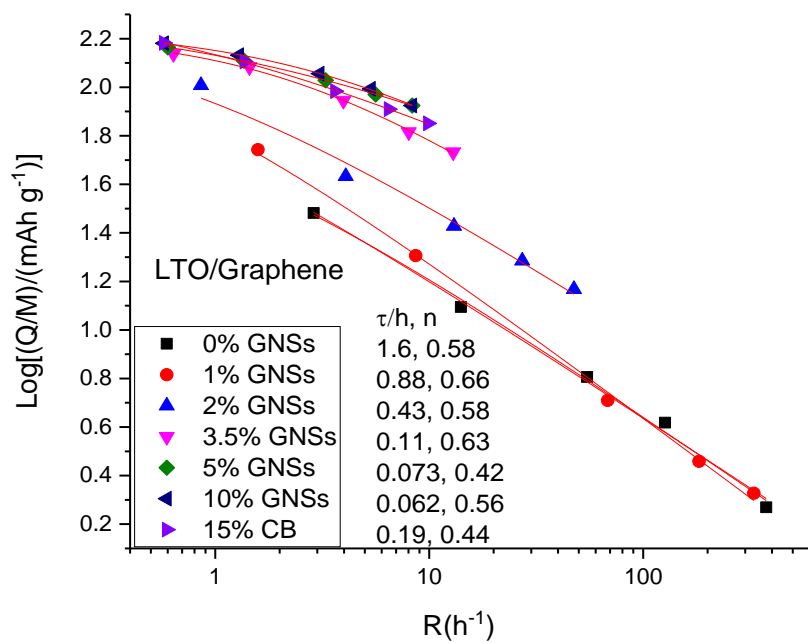

Supplementary Figure 35. LTO/Graphene fits. (Supplementary Table 5, row 8)

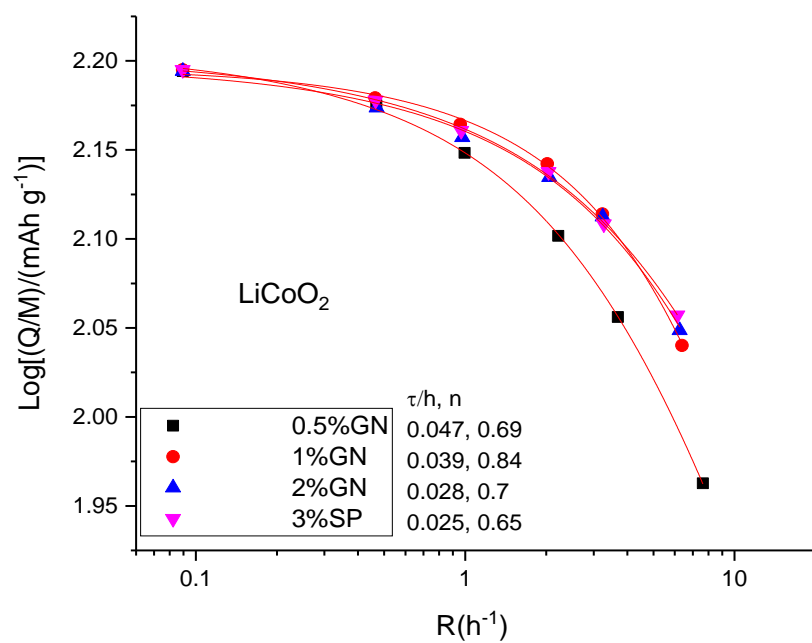

**Supplementary Figure 36.** LCO/Graphene fits. (Supplementary Table 5, row 9)

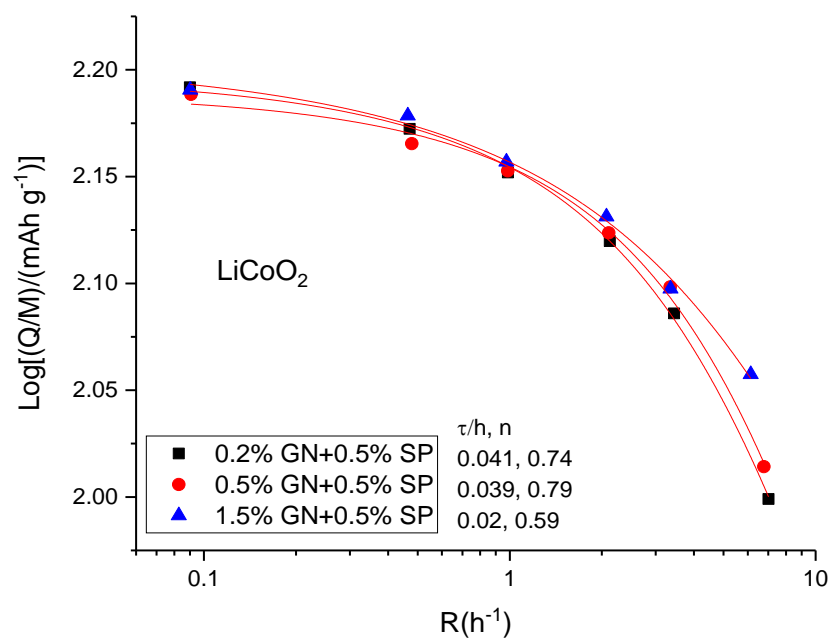

**Supplementary Figure 37.** LCO/Graphene/0.5wt.% Super P fits. (Supplementary Table 5, row 9)

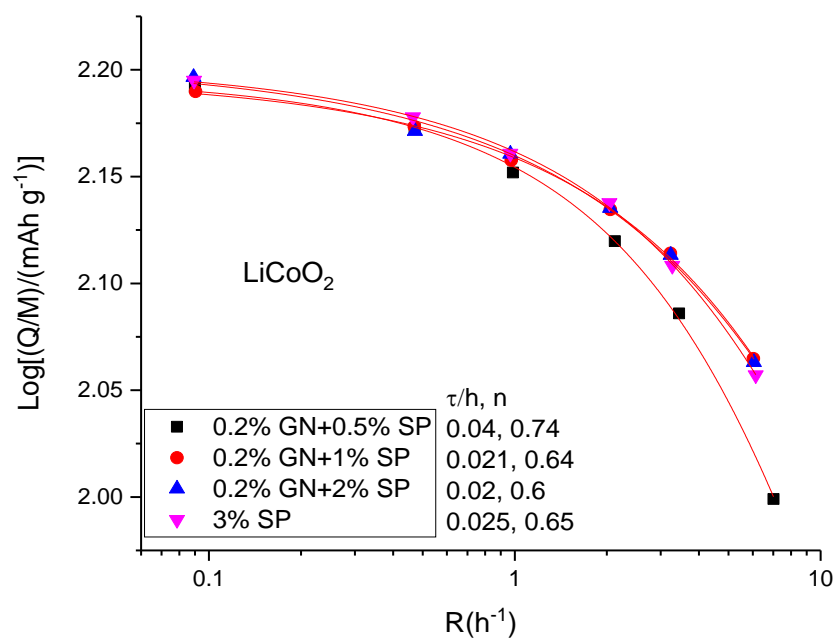

**Supplementary Figure 38.** LCO/0.2wt.% Graphene/Super P fits. (Supplementary Table 5, row 9)

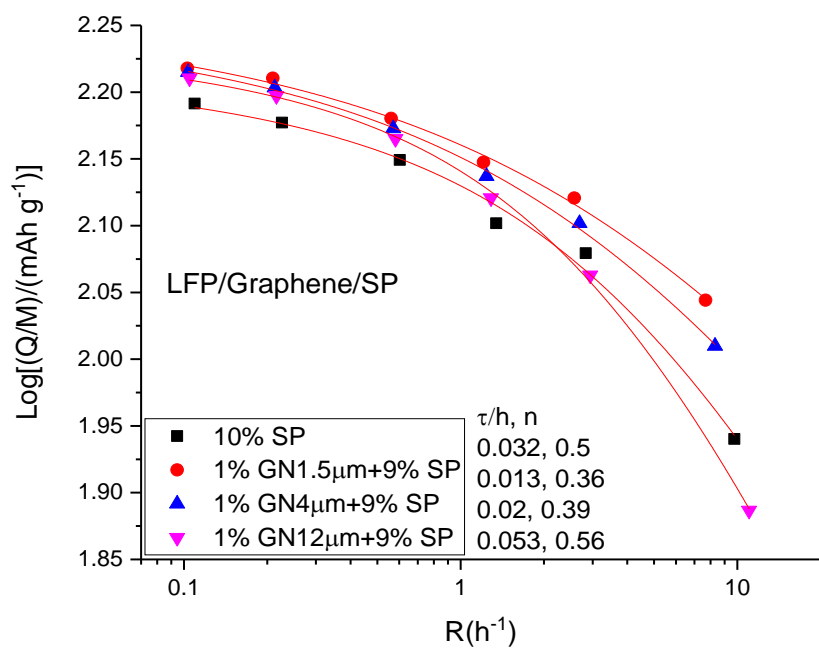

**Supplementary Figure 39.** LFP/Graphene/Super P fits. (Supplementary Table 5, row 10)



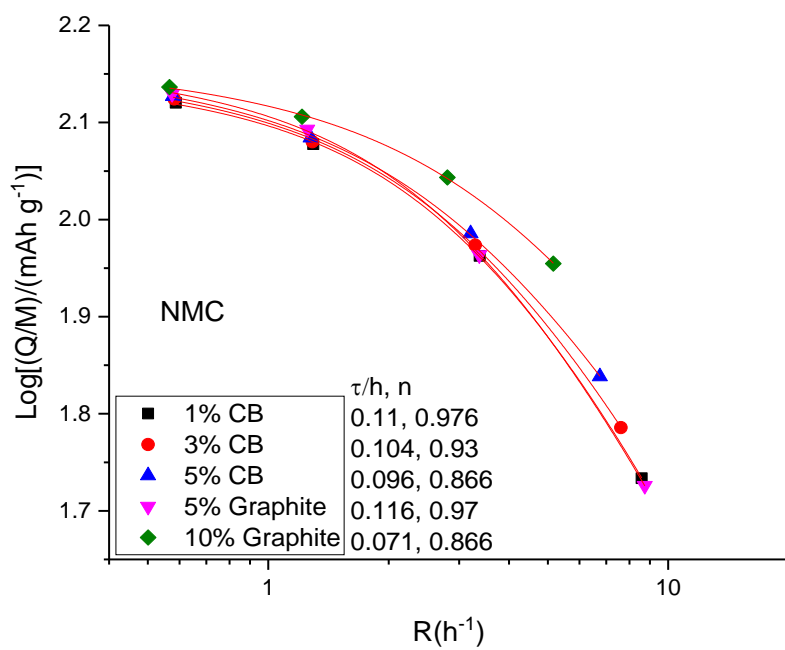

**Supplementary Figure 40.** NMC/Graphite/CB fits. (Supplementary Table 5, row 11)

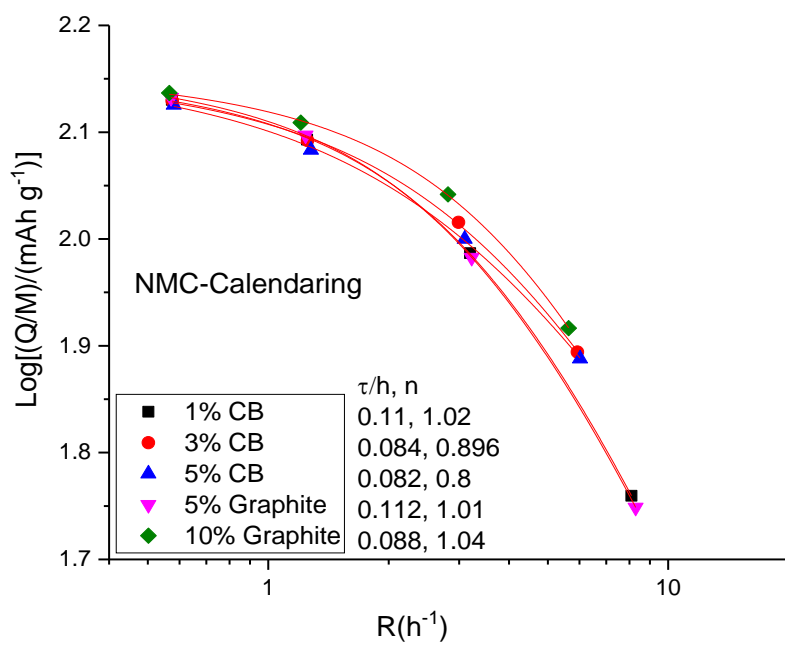

**Supplementary Figure 41.** NMC/Graphite/CB with Calendaring fits. (Supplementary Table 5, row 11)

## Supplementary Tables

**Supplementary Table 1.** Physical percolation properties from references (figure 3 main text).

|          | $(C_{eff}/V)/\sigma_M$ | $\sigma_0/\sigma_M$ | s   | $\beta_1$            | $Q_V$               | $C_{V,eff}$          | $\sigma_M$           | $\sigma_0$           |
|----------|------------------------|---------------------|-----|----------------------|---------------------|----------------------|----------------------|----------------------|
| units    | $\text{s m}^{-2}$      | -                   | -   | $\text{s m}^{-2}$    | $\text{mAh m}^{-3}$ | $\text{F m}^{-3}$    | $\text{S m}^{-1}$    | $\text{S m}^{-1}$    |
| J Zhang  | $2.7 \times 10^{14}$   | 1060                | 3   | $2 \times 10^9$      | $2.0 \times 10^9$   | $5.6 \times 10^{10}$ | $1.0 \times 10^{-4}$ | 0.11                 |
| J Coelho | $10^{15}$              | 4000                | 1.4 | $2 \times 10^9$      | $2.8 \times 10^8$   | $7.8 \times 10^9$    | $3.9 \times 10^{-6}$ | $1.6 \times 10^{-2}$ |
| B Zhang  | $5.5 \times 10^{13}$   | $4 \times 10^6$     | 3.5 | $2.2 \times 10^{12}$ | $5.3 \times 10^8$   | $1.5 \times 10^{10}$ | $1.3 \times 10^{-4}$ | $5.4 \times 10^2$    |
| Yu       | $3.3 \times 10^{11}$   | $1.2 \times 10^6$   | 2.7 | $2.3 \times 10^9$    | $4.8 \times 10^8$   | $1.3 \times 10^{10}$ | $2.0 \times 10^{-2}$ | $2.5 \times 10^4$    |

## Cohort I: Lithium ion batteries

**Supplementary Table 2.** Literature details for Cohort IA

| Row No.                                                                             | Electrode                                                                          | Electrode composition                                            | Mass loading ( $M_{Total}/A$ and $M_{AM}/A$ )             | Particle size, morphology or density                                            | Electrode thickness | Ref. |
|-------------------------------------------------------------------------------------|------------------------------------------------------------------------------------|------------------------------------------------------------------|-----------------------------------------------------------|---------------------------------------------------------------------------------|---------------------|------|
| <b>NMC111 (1C = 200 mA g<sup>-1</sup>)</b>                                          |                                                                                    |                                                                  |                                                           |                                                                                 |                     |      |
| 1                                                                                   | Carbon coated NMC111                                                               | AM: PTFE: C = 80: 5: 15                                          | 6.3 mg cm <sup>-2</sup> (AM: 5 mg cm <sup>-2</sup> )      | Particle size: 50–200 nm                                                        | ≈ 40 μm             | 1    |
|                                                                                     |                                                                                    |                                                                  |                                                           | Particle size: 150 nm with 10 nm carbon coating                                 |                     |      |
| 2                                                                                   | Slurry-casted NMC111 electrode                                                     | NMC111: CB: PVDF = 85: 7: 8                                      | 28 mg cm <sup>-2</sup> (NMC: 24 mg cm <sup>-2</sup> )     | Particle size: 6–8 μm                                                           | 104 μm              | 2    |
| 3                                                                                   | Slurry-casted NMC111 electrode                                                     | NMC111: CB: graphite: PVDF = 90: 3: 4: 3<br>Full Pouch bag cells | 82 mg cm <sup>-2</sup> (NMC: 73.8 mg cm <sup>-2</sup> )   | Commercial NMC (BASF)                                                           | 305 μm              | 3    |
| <b>LiNi<sub>0.5</sub>Mn<sub>1.5</sub>O<sub>4</sub> (1C = 147 mA g<sup>-1</sup>)</b> |                                                                                    |                                                                  |                                                           |                                                                                 |                     |      |
| 4                                                                                   | Electrospray/spinning of LMNO                                                      | LMNO: MWCNT: PAN = 72: 3.6: 24.4                                 | 80 mg cm <sup>-2</sup> (LMNO: 57 mg cm <sup>-2</sup> )    | Particle size: 100–500 nm                                                       | 420 μm              | 4    |
| <b>LiCoO<sub>2</sub> (1C = 140 mA g<sup>-1</sup>)</b>                               |                                                                                    |                                                                  |                                                           |                                                                                 |                     |      |
| 5                                                                                   | LiCoO <sub>2</sub> /CNT free-standing film by vacuum-filtration (CNT as substrate) | LCO: CB: PVDF = 77.5: 12.5: 10                                   | 16.1 mg cm <sup>-2</sup> (LCO: 12.5 mg cm <sup>-2</sup> ) | Particle size: 5–10 μm                                                          | 150 μm              | 5    |
| 6                                                                                   | Mechanically pressed LiCoO <sub>2</sub> pellet electrode                           | Free-standing pellet                                             | 97.16 mg cm <sup>-2</sup>                                 | 74% of the theoretical crystal density (5.05 g cm <sup>-3</sup> )               | 260 μm              | 6    |
|                                                                                     |                                                                                    |                                                                  | 149.48 mg cm <sup>-2</sup>                                |                                                                                 | 400 μm              |      |
|                                                                                     |                                                                                    |                                                                  | 298.96 mg cm <sup>-2</sup>                                |                                                                                 | 800 μm              |      |
|                                                                                     |                                                                                    |                                                                  | 114.23 mg cm <sup>-2</sup>                                | 87% of the theoretical crystal density (5.05 g cm <sup>-3</sup> )               | 260 μm              |      |
|                                                                                     |                                                                                    |                                                                  | 175.74 mg cm <sup>-2</sup>                                |                                                                                 | 400 μm              |      |
| 351.48 mg cm <sup>-2</sup>                                                          | 800 μm                                                                             |                                                                  |                                                           |                                                                                 |                     |      |
| <b>LiFePO<sub>4</sub> (1C = 170 mA g<sup>-1</sup>)</b>                              |                                                                                    |                                                                  |                                                           |                                                                                 |                     |      |
| 7                                                                                   | High tap density nanoplate packed LiFePO <sub>4</sub> /C microspheres              | AM: AB: PTFE = 75: 20: 5 (Symmetric charge/discharge rate)       | ≈ 6.67 mg cm <sup>-2</sup> (AM: 5 mg cm <sup>-2</sup> )   | Secondary particle size: 0.5–2 μm<br>Tap density for AM: 1.4 g cm <sup>-3</sup> | ≈ 50 μm             | 7    |

|                                                                                |                                                                                               |                                                                        |                                                               |                                                                          |                         |    |
|--------------------------------------------------------------------------------|-----------------------------------------------------------------------------------------------|------------------------------------------------------------------------|---------------------------------------------------------------|--------------------------------------------------------------------------|-------------------------|----|
| 8                                                                              | Soft-contact conductive carbon (SCC) to LiFePO <sub>4</sub>                                   | LFP: SCC: PTFE = 70: 20: 10                                            | 3.64 mg cm <sup>-2</sup><br>(AM: 2.55 mg cm <sup>-2</sup> )   | Particle size: 50 nm                                                     | 15 μm                   | 8  |
| 9                                                                              | Vacuum-filtrated CNF-CNT-LiFePO <sub>4</sub> film                                             | LFP: CNT: CNF = 80: 15: 5                                              | 5.5 mg cm <sup>-2</sup><br>(LFP: 4.4 mg cm <sup>-2</sup> )    | Particle size: 200–700 nm                                                | ≈ 60 μm                 | 9  |
| 10                                                                             | Slurry-coating LiFePO <sub>4</sub> onto porous metal foam substrate                           | LFP/C: CB: PVDF = 75: 15: 10                                           | 43.3 mg cm <sup>-2</sup><br>(AM: 32.5 mg cm <sup>-2</sup> )   | Particle size: Unknown<br><br>Electrode density: 1.35 g cm <sup>-3</sup> | 330 μm                  | 10 |
|                                                                                |                                                                                               |                                                                        | 62 mg cm <sup>-2</sup><br>(AM: 46.5 mg cm <sup>-2</sup> )     |                                                                          | 430 μm                  |    |
|                                                                                |                                                                                               |                                                                        | 75.1 mg cm <sup>-2</sup><br>(AM: 56.3 mg cm <sup>-2</sup> )   |                                                                          | 540 μm                  |    |
| <b>Si (1C = 3500 mA g<sup>-1</sup>)</b>                                        |                                                                                               |                                                                        |                                                               |                                                                          |                         |    |
| 11                                                                             | PEDOT: PSS + CMC binder                                                                       | Si: AB: (PEDOT: PSS): CMC = 70:10:10:10                                | 1.5 mg cm <sup>-2</sup><br>(Si: 1.05 mg cm <sup>-2</sup> )    | Particle size: 50–100 nm                                                 | 10 μm                   | 11 |
| 12                                                                             | CVD growth of Si nanowires                                                                    | Si film <i>via</i> CVD                                                 | Si: 2.47 mg cm <sup>-2</sup>                                  | Nanowires with D ≈ 300nm                                                 | 90 μm                   | 12 |
| 13                                                                             | Si-graphene composite by vacuum filtration                                                    | Si: graphene = 62: 38                                                  | 3.7 mg cm <sup>-2</sup><br>(Si: 2.3 mg cm <sup>-2</sup> )     | Particle size: ≈100 nm                                                   | 28 μm                   | 13 |
| 14                                                                             | Si nanowire-graphene composites                                                               | Si: 70–80%                                                             | ≈ 8 mg cm <sup>-2</sup><br>(Si: 6 mg cm <sup>-2</sup> )       | Nanowires with D= 10–100 nm                                              | 40 μm                   | 14 |
| <b>Li<sub>4</sub>Ti<sub>5</sub>O<sub>12</sub> (1C = 175 mA g<sup>-1</sup>)</b> |                                                                                               |                                                                        |                                                               |                                                                          |                         |    |
| 15                                                                             | Flexible and self-standing electrodes <i>via</i> vacuum filtration                            | LTO: MWCNTs= 85: 15                                                    | 5.25 mg cm <sup>-2</sup><br>(LTO: 4.46 mg cm <sup>-2</sup> )  | Particle size: 2 μm                                                      | 25 μm                   | 15 |
| 16                                                                             | Mesoporous spinel Li <sub>4</sub> Ti <sub>5</sub> O <sub>12</sub> nanosheets                  | AM: AB: PTFE = 80: 10: 10                                              | 10.6 mg cm <sup>-2</sup><br>(AM: 8.5 mg cm <sup>-2</sup> )    | Mesoporous nanosheets: 150–200 nm                                        | 30 μm                   | 16 |
| 17                                                                             | Rutile-TiO <sub>2</sub> nanocoated Li <sub>4</sub> Ti <sub>5</sub> O <sub>12</sub> nanosheets | AM: Super P: PVDF = 80: 10: 10                                         | 12.5 mg cm <sup>-2</sup><br>(AM: 10 mg cm <sup>-2</sup> )     | Nanosheets thickness: 30–60 nm<br>(AM: 1.5 g cm <sup>-3</sup> )          | ≈ 100 μm<br>(AM: 70 μm) | 17 |
| <b>Graphite (1C = 372 mA g<sup>-1</sup>)</b>                                   |                                                                                               |                                                                        |                                                               |                                                                          |                         |    |
| 18                                                                             | Magnetically aligned graphite electrodes                                                      | Large graphite flakes: Small flakes: PVP: Super P= 15.4: 3.8: 2.4: 2.3 | 6.3 mg cm <sup>-2</sup><br>(Graphite: 5 mg cm <sup>-2</sup> ) | Graphite size: Large flake ≤ 44 μm<br>small flakes: 7–10 μm              | ≈ 110 μm                | 18 |
| 19                                                                             | Coating of graphite anode with coal tar pitch as an effective precursor                       | AM: SBR: CMC = 90: 5: 5                                                | 6 mg cm <sup>-2</sup><br>(AM: 5.4 mg cm <sup>-2</sup> )       | particle size 10 μm<br>Active material: 1.5 g cm <sup>-3</sup>           | 40 μm                   | 19 |

**Supplementary Table 3.** Literature details for Cohort IB (data sets with varying electrode thickness)

| Row No.                                                                                                                                        | Electrode                                                                 | Electrode details                                                                  | Electrolyte details                                                                                                                                                                                                                        | Separator thickness | Ref. |
|------------------------------------------------------------------------------------------------------------------------------------------------|---------------------------------------------------------------------------|------------------------------------------------------------------------------------|--------------------------------------------------------------------------------------------------------------------------------------------------------------------------------------------------------------------------------------------|---------------------|------|
| <b>Theoretical density:</b><br><b>NMC-4.77 g cm<sup>-3</sup></b><br><b>LFP-3.6 g cm<sup>-3</sup></b><br><b>Graphite-2.25 g cm<sup>-3</sup></b> |                                                                           |                                                                                    |                                                                                                                                                                                                                                            |                     |      |
| 1                                                                                                                                              | Slurry-casted NMC111/LFP electrode                                        | NMC111<br>Thickness: 24–104 μm<br>Density: 2.7 g cm <sup>-3</sup><br>Porosity: 44% | 1 M LiPF <sub>6</sub> in EC/DEC=1:1<br>$\sigma_{BL} \approx 0.8 \text{ S m}^{-1}$                                                                                                                                                          | Unknown             | 2    |
|                                                                                                                                                |                                                                           | LFP<br>Thickness: 10–108 μm<br>Density: 1.8 g cm <sup>-3</sup><br>Porosity: 50%    |                                                                                                                                                                                                                                            |                     |      |
| 2                                                                                                                                              | Slurry-casted NMC622 or graphite electrodes with different areal capacity | NMC622<br>Thickness: 48–154 μm<br>Porosity: 32–37%                                 | 1 M LiPF <sub>6</sub> in EC/EMC (3:7 weight ratio) + additional 2 wt.% vinylene carbonate (BASF)<br>$\sigma_{BL} \approx 0.5 \text{ S m}^{-1}$                                                                                             | Unknown             | 20   |
|                                                                                                                                                |                                                                           | Graphite<br>Thickness: 58–182 μm<br>Porosity: 37–40%                               |                                                                                                                                                                                                                                            |                     |      |
| <b>Nb<sub>2</sub>O<sub>5</sub>/Graphene composite-3.85 g cm<sup>-3</sup></b>                                                                   |                                                                           |                                                                                    |                                                                                                                                                                                                                                            |                     |      |
| 3                                                                                                                                              | Three-dimensional holey-graphene/niobia composites                        | Electrode porosity: ≈ 60%.                                                         | 1 M LiPF <sub>6</sub> in EC/DMC (1:1 volume ratio, BASF)<br>$\sigma_{BL} \approx 1.16 \text{ S m}^{-1}$                                                                                                                                    | Unknown             | 21   |
| <b>LFP-3.6 g cm<sup>-3</sup></b>                                                                                                               |                                                                           |                                                                                    |                                                                                                                                                                                                                                            |                     |      |
| 4                                                                                                                                              | LiFePO <sub>4</sub> cathodes with different electrode parameters          | Density: 2.2 vs. 1.55 g cm <sup>-3</sup> .<br>Porosity: 40% vs. 57%.               | 0.7, 1.0, and 1.3 M LiPF <sub>6</sub> in EC/DEC or EC/DMC (3:7 by volume ratio)<br><br>$\sigma_{BL}$ :<br>1 M LiPF <sub>6</sub> in EC/DEC (3:7): 0.724 S m <sup>-1</sup><br>1 M LiPF <sub>6</sub> in EC/DMC (3:7): 1.872 S m <sup>-1</sup> | Unknown             | 22   |
| <b>GaS - 3.86 g cm<sup>-3</sup></b>                                                                                                            |                                                                           |                                                                                    |                                                                                                                                                                                                                                            |                     |      |

|                                                                                                                                                                               |                                                                          |                                                                                                 |                                                                                                                                                    |                  |           |
|-------------------------------------------------------------------------------------------------------------------------------------------------------------------------------|--------------------------------------------------------------------------|-------------------------------------------------------------------------------------------------|----------------------------------------------------------------------------------------------------------------------------------------------------|------------------|-----------|
| 5                                                                                                                                                                             | Liquid-phase exfoliated 2D gallium chalcogenide nanosheet/CNT composites | Thickness: 5–29 $\mu\text{m}$<br>Density: 0.44–0.6 $\text{g cm}^{-3}$<br>Porosity: 84–89%.      | 1 M $\text{LiClO}_4$ in EC/DMC (1:1 volume ratio)<br>$\sigma_{BL} \approx 0.5 \text{ S m}^{-1}$                                                    | 50 $\mu\text{m}$ | 23        |
| <b>Data collected by us</b><br><b>Si-2.33 <math>\text{g cm}^{-3}</math></b><br><b>LTO-3.42 <math>\text{g cm}^{-3}</math></b><br><b>NMC-4.77 <math>\text{g cm}^{-3}</math></b> |                                                                          |                                                                                                 |                                                                                                                                                    |                  |           |
| 6                                                                                                                                                                             | LTO/CNT                                                                  | Thickness: 5–100 $\mu\text{m}$<br>Density: 0.5 $\text{g cm}^{-3}$<br>Porosity: 85%.             | 1 M $\text{LiPF}_6$ in EC/DEC/FEC, (3:6:1 volume ratio, BASF) with 2 wt% VC<br>$\sigma_{BL} \approx 0.5\text{--}1.0 \text{ S m}^{-1}$              | 25 $\mu\text{m}$ | This work |
| 7                                                                                                                                                                             | NMC/CNT                                                                  | Thickness: 115–540 $\mu\text{m}$<br>Density: 1.75–2.13 $\text{g cm}^{-3}$<br>Porosity: 55–63 %. | Half Cell:<br>1 M $\text{LiPF}_6$ in EC/DEC/FEC (3:6:1 volume ratio, BASF) with 2 wt% VC<br>$\sigma_{BL} \approx 0.5\text{--}1.0 \text{ S m}^{-1}$ | 25 $\mu\text{m}$ | This work |
| 8                                                                                                                                                                             | SiGr/CNT                                                                 | Thickness: 30–300 $\mu\text{m}$<br>Density: 0.4 $\text{g cm}^{-3}$<br>Porosity: 83%.            | 1 M $\text{LiPF}_6$ in EC/DEC/FEC (3:6:1 volume ratio, BASF) with 2 wt% VC<br>$\sigma_{BL} \approx 0.5\text{--}1.0 \text{ S m}^{-1}$               | 25 $\mu\text{m}$ | This work |
| 9                                                                                                                                                                             | $\mu\text{Si}$ /CNT                                                      | Thickness: 30–170 $\mu\text{m}$<br>Density: 0.43–0.64 $\text{g cm}^{-3}$<br>Porosity: 73–82%.   | 1 M $\text{LiPF}_6$ in EC/DEC/FEC (3:6:1 volume ratio, BASF) with 2 wt% VC<br>$\sigma_{BL} \approx 0.5\text{--}1.0 \text{ S m}^{-1}$               | 25 $\mu\text{m}$ | This work |

## Cohort II: Sodium ion batteries

**Supplementary Table 4.** Literature details for Cohort II (Na-ion batteries)

| Row No.                                                                                                                               | Electrode                                                                                  | Electrode composition                                                                           | Mass loading ( $M_{\text{Total}}/A$ and $M_{\text{AM}}/A$ )           | Particle size, morphology or density                      | Electrode thickness          | Ref. |
|---------------------------------------------------------------------------------------------------------------------------------------|--------------------------------------------------------------------------------------------|-------------------------------------------------------------------------------------------------|-----------------------------------------------------------------------|-----------------------------------------------------------|------------------------------|------|
| <b>Cathode</b>                                                                                                                        |                                                                                            |                                                                                                 |                                                                       |                                                           |                              |      |
| <b><math>\text{Na}_{0.44}\text{MnO}_2</math> (<math>\text{Na}_4\text{Mn}_9\text{O}_{18}</math>) (1C = 120 mA g<sup>-1</sup>)</b>      |                                                                                            |                                                                                                 |                                                                       |                                                           |                              |      |
| 1                                                                                                                                     | $\text{Na}_{0.44}\text{MnO}_2$ nanoplate cathode                                           | AM: Super C65: PVDF = 80: 10: 10                                                                | 2 mg cm <sup>-2</sup><br>(AM: 1.6 mg cm <sup>-2</sup> )               | Particle size: 6 μm in length and 2 μm in width           | ≈ 10–20 μm                   | 24   |
| <b><math>\text{Na}_2\text{FeP}_2\text{O}_7</math> (1C = 97 mA g<sup>-1</sup>)<br/>Theoretical density: 3.15 g cm<sup>-3</sup></b>     |                                                                                            |                                                                                                 |                                                                       |                                                           |                              |      |
| 2                                                                                                                                     | $\text{Na}_2\text{FeP}_2\text{O}_7$ nanoparticles on porous carbon cloth                   | AM: Super P: PVDF = 70: 15: 15                                                                  | 1.4–2.1 mg cm <sup>-2</sup><br>(NMC: 1–1.5 mg cm <sup>-2</sup> )      | Particle size: 20 – 50 nm<br>Particles embedded in carbon | ≈ 10 μm                      | 25   |
| <b><math>\text{Na}_2\text{FePO}_4\text{F}</math> (1C = 124 mA g<sup>-1</sup>)<br/>Theoretical density: 3.32 g cm<sup>-3</sup></b>     |                                                                                            |                                                                                                 |                                                                       |                                                           |                              |      |
| 3                                                                                                                                     | $\text{Na}_2\text{FePO}_4\text{F}$ nanoparticles by enhancing surface carbon functionality | AM: Super P: PVDF = 70: 20: 10<br>(AM mixed by $\text{Na}_2\text{FePO}_4\text{F}$ : GO = 80/20) | 1–2 mg cm <sup>-2</sup><br>(AM: 0.7–1.4 mg cm <sup>-2</sup> )         | Particle size: 25 nm                                      | < 10 μm (doctor-blade 10 μm) | 26   |
| <b><math>\text{Na}_2\text{VTi}(\text{PO}_4)_3</math> (1C = 147 mA g<sup>-1</sup>)</b>                                                 |                                                                                            |                                                                                                 |                                                                       |                                                           |                              |      |
| 4                                                                                                                                     | $\text{Na}_2\text{VTi}(\text{PO}_4)_3$ as ionic conductor structured electrode             | AM: Super P: PVDF = 70: 20: 10                                                                  | 1.75–2.2 mg cm <sup>-2</sup><br>(AM: 1.225–1.54 mg cm <sup>-2</sup> ) | Particle size: ≈ 200 nm                                   | ≈ 15–20 μm                   | 27   |
| <b><math>\text{Na}_3\text{V}_2(\text{PO}_4)_3</math> (1C = 110 mA g<sup>-1</sup>)<br/>Theoretical density: 3.21 g cm<sup>-3</sup></b> |                                                                                            |                                                                                                 |                                                                       |                                                           |                              |      |
| 5                                                                                                                                     | Carbon-coated $\text{Na}_3\text{V}_2(\text{PO}_4)_3$ embedded in porous carbon matrix      | AM: Super P: PVDF = 70: 20: 10                                                                  | 1.43 mg cm <sup>-2</sup><br>(AM: 1 mg cm <sup>-2</sup> )              | Particle size: 60 nm                                      | ≈ 20 μm                      | 28   |
| 6                                                                                                                                     | Hierarchical carbon framework wrapped $\text{Na}_3\text{V}_2(\text{PO}_4)_3$ as a cathode  | AM: AB: PVDF = 70: 20: 10                                                                       | 1.43 mg cm <sup>-2</sup><br>(AM: 1 mg cm <sup>-2</sup> )              | Particle size: 100–500 nm                                 | ≈ 15 μm                      | 29   |



|                                                                                                                                               |                                                                                                                      |                                                                                                                                                                 |                                                                                   |                                    |                                                                                             |    |
|-----------------------------------------------------------------------------------------------------------------------------------------------|----------------------------------------------------------------------------------------------------------------------|-----------------------------------------------------------------------------------------------------------------------------------------------------------------|-----------------------------------------------------------------------------------|------------------------------------|---------------------------------------------------------------------------------------------|----|
| 7                                                                                                                                             | Layer-by-Layer<br>$\text{Na}_3\text{V}_2(\text{PO}_4)_3$<br>embedded in rGO                                          | AM: CB:<br>PVDF<br>= 70: 20: 10                                                                                                                                 | 1.5–2.0 $\text{mg cm}^{-2}$<br>(AM: 1–1.4 $\text{mg cm}^{-2}$ )                   | Particle size: 200<br>nm           | $\approx 15\text{--}20$<br>$\mu\text{m}$                                                    | 30 |
| <b><math>\text{NaCrO}_2</math> (1C = 110 mA <math>\text{g}^{-1}</math>)</b><br><b>Theoretical density: 4.36 <math>\text{g cm}^{-3}</math></b> |                                                                                                                      |                                                                                                                                                                 |                                                                                   |                                    |                                                                                             |    |
| 8                                                                                                                                             | Layered $\text{O}_3$ -type<br>carbon-coated<br>$\text{NaCrO}_2$ cathode for<br>Na-ion battery<br>(Yu <i>et al.</i> ) | AM: KS-6:<br>Super P:<br>PVDF<br>= 85: 3.75:<br>3.75: 7.5<br>All samples<br>with x wt%<br>carbon<br>coating<br>( $0 < x < 16.6\%$<br>) + 7.5% (KS-<br>6+superP) | 4.1 $\text{mg cm}^{-2}$<br>(AM: 3.5 $\text{mg cm}^{-2}$ )                         | Particle size: $\approx$<br>500 nm | $\approx 20$ $\mu\text{m}$                                                                  | 31 |
| <b><math>\text{FePO}_4</math> (1C = 178 mA <math>\text{g}^{-1}</math>)</b><br><b>Theoretical density 2.87 <math>\text{g cm}^{-3}</math></b>   |                                                                                                                      |                                                                                                                                                                 |                                                                                   |                                    |                                                                                             |    |
| 9                                                                                                                                             | Mesoporous $\text{FePO}_4$<br>nanospheres as<br>cathode                                                              | AM: KB:<br>PVDF<br>= 70: 20: 10                                                                                                                                 | 2 $\text{mg cm}^{-2}$<br>(AM: 1.4 $\text{mg cm}^{-2}$ )                           | Particle size: 100<br>nm           | $\approx 30$ $\mu\text{m}$                                                                  | 32 |
| <b>Anode</b>                                                                                                                                  |                                                                                                                      |                                                                                                                                                                 |                                                                                   |                                    |                                                                                             |    |
| <b><math>\text{TiO}_2</math> (1C = 335 mA <math>\text{g}^{-1}</math>)</b><br><b>Theoretical density: 4.23 <math>\text{g cm}^{-3}</math></b>   |                                                                                                                      |                                                                                                                                                                 |                                                                                   |                                    |                                                                                             |    |
| 10                                                                                                                                            | Carbon-coated<br>anatase $\text{TiO}_2$ anode                                                                        | $\text{TiO}_2$ :<br>Carbon<br>coating:<br>Super C65:<br>PVDF<br>=<br>65:12:13:10                                                                                | 1.85–2.31 $\text{mg cm}^{-2}$<br>( $\text{TiO}_2$ : 1.2–1.5 $\text{mg cm}^{-2}$ ) | Particle size: 11<br>nm            | $< 120$ $\mu\text{m}$<br>(doctor-<br>blade)<br><br>$\approx 20\text{--}30$<br>$\mu\text{m}$ | 33 |
|                                                                                                                                               |                                                                                                                      | $\text{TiO}_2$ :<br>Carbon<br>coating:<br>Super C65:<br>PVDF<br>=<br>65:9:16:10                                                                                 | 1.85–2.77 $\text{mg cm}^{-2}$<br>( $\text{TiO}_2$ : 1.2–1.8 $\text{mg cm}^{-2}$ ) | Particle size: 40<br>nm            |                                                                                             |    |
|                                                                                                                                               |                                                                                                                      | $\text{TiO}_2$ :<br>Carbon<br>coating:<br>Super C65:<br>PVDF<br>=<br>65:0:25:10                                                                                 | 1.85 $\text{mg cm}^{-2}$<br>( $\text{TiO}_2$ : 1.2 $\text{mg cm}^{-2}$ )          | Particle size: 15<br>nm            |                                                                                             |    |

| Carbon ( $1C = 372 \text{ mA g}^{-1}$ )<br>Theoretical density: $2.26 \text{ g cm}^{-3}$   |                                                                           |                                 |                                                             |                                                                                                                                    |                          |    |
|--------------------------------------------------------------------------------------------|---------------------------------------------------------------------------|---------------------------------|-------------------------------------------------------------|------------------------------------------------------------------------------------------------------------------------------------|--------------------------|----|
| 11                                                                                         | Hard carbon anode<br><i>via</i> graphene oxide<br>as dehydration<br>agent | AM: PVDF<br>= 93: 7             | $2.7 \text{ mg cm}^{-2}$<br>(AM: $2.5 \text{ mg cm}^{-2}$ ) | Without GO<br>particle size:<br>30–80 $\mu\text{m}$                                                                                | 40 $\mu\text{m}$         | 34 |
|                                                                                            |                                                                           |                                 |                                                             | With GO particle<br>size: 80–110 $\mu\text{m}$                                                                                     |                          |    |
| Graphite ( $1C = 372 \text{ mA g}^{-1}$ )<br>Theoretical density: $2.28 \text{ g cm}^{-3}$ |                                                                           |                                 |                                                             |                                                                                                                                    |                          |    |
| 12                                                                                         | Expanded graphite<br>(EG) as anode                                        | EG: Na<br>alginate<br>= 85: 15  | $0.6 \text{ mg cm}^{-2}$<br>(EG: $0.5 \text{ mg cm}^{-2}$ ) | (Unknown)                                                                                                                          | $\approx 10 \mu\text{m}$ | 35 |
| 13                                                                                         | Natural graphite<br>using ether-based<br>electrolytes                     | AM: CB:<br>PVDF<br>= 70: 20: 10 | $4.3 \text{ mg cm}^{-2}$<br>(AM: $3 \text{ mg cm}^{-2}$ )   | Particle size<br>100 $\mu\text{m}$                                                                                                 | 45 $\mu\text{m}$         | 36 |
| Sb ( $1C = 660 \text{ mA g}^{-1}$ )<br>Theoretical density: $6.68 \text{ g cm}^{-3}$       |                                                                           |                                 |                                                             |                                                                                                                                    |                          |    |
| 14                                                                                         | Monodispersed Sb<br>nanocrystals for Li-<br>/Na-ion battery<br>anodes     | AM: CB:<br>CMC<br>= 64: 21: 15  | $1 \text{ mg cm}^{-2}$<br>(AM: $0.64 \text{ mg cm}^{-2}$ )  | Particle size: $\leq$<br>74 $\mu\text{m}$                                                                                          | 10–15 $\mu\text{m}$      | 37 |
|                                                                                            |                                                                           |                                 |                                                             | Particle size: 10<br>nm                                                                                                            |                          |    |
|                                                                                            |                                                                           |                                 |                                                             | Particle size: 20<br>nm                                                                                                            |                          |    |
| 15                                                                                         | Rod-like Sb–C<br>composite as<br>anodes for Li-/ Na-<br>ion batteries     | AM: CB:<br>PVDF<br>= 70: 20: 10 | $3 \text{ mg cm}^{-2}$<br>(AM: $2 \text{ mg cm}^{-2}$ )     | Secondary micro-<br>rods: 6 $\mu\text{m}$ in<br>length, 2 $\mu\text{m}$ in<br>diameter<br>Primary<br>nanoparticles<br>size: 200 nm | $\approx 40 \mu\text{m}$ | 38 |

### Cohort III: Varying conductive additive Mf

**Supplementary Table 5.** Literature details for Cohort III

| Row No.                                                                          | Electrode                                                                                                                       | Electrode composition                                                     | Mass loading ( $M_{Total}/A$ and $M_{AM}/A$ )           | Particle size, morphology or density       | Electrode thickness | Ref. |
|----------------------------------------------------------------------------------|---------------------------------------------------------------------------------------------------------------------------------|---------------------------------------------------------------------------|---------------------------------------------------------|--------------------------------------------|---------------------|------|
| <b>Li<sub>4</sub>Ti<sub>5</sub>O<sub>12</sub> (1C = 175 mA g<sup>-1</sup>)</b>   |                                                                                                                                 |                                                                           |                                                         |                                            |                     |      |
| 1                                                                                | LTO/SWCNT composites (Coelho <i>et al.</i> )                                                                                    | Different mass fractions of CNTs                                          | AM: 0.2 mg cm <sup>-2</sup>                             | Particle size: 174 nm                      | 1.1 μm              | 39   |
| <b>MoS<sub>2</sub></b>                                                           |                                                                                                                                 |                                                                           |                                                         |                                            |                     |      |
| 2                                                                                | MoS <sub>2</sub> intercalated p-Ti <sub>3</sub> C <sub>2</sub> anode (Zheng <i>et al.</i> )                                     | AM: AB: PVDF = 80: 10: 10                                                 | Unknown                                                 | Unknown                                    | Unknown             | 40   |
| <b>MWCNT (1C = 400 mA g<sup>-1</sup>)</b>                                        |                                                                                                                                 |                                                                           |                                                         |                                            |                     |      |
| 3                                                                                | CuNW-MWCNT composite anodes (Yin <i>et al.</i> )                                                                                | CuNW:MWCNT = 1:1, 3:1, 5:1, and 7:1, w/w                                  | CNT: 1.46 mg cm <sup>-2</sup>                           | CuNW with D ≈ 100 nm<br>CNT with D = 10 nm | 61–126 μm           | 41   |
| <b>NaTi<sub>2</sub>(PO<sub>4</sub>)<sub>3</sub> (1C = 133 mA g<sup>-1</sup>)</b> |                                                                                                                                 |                                                                           |                                                         |                                            |                     |      |
| 4                                                                                | CNT decorated NaTi <sub>2</sub> (PO <sub>4</sub> ) <sub>3</sub> /C nanocomposite for Na-ion battery anode (Wang <i>et al.</i> ) | AM: AB: PVDF = 80: 10: 10                                                 | 2 mg cm <sup>-2</sup><br>(AM: 1.6 mg cm <sup>-2</sup> ) | Particle size: < 100 nm                    | Unknown             | 42   |
| <b>SnS<sub>2</sub>/MXene</b>                                                     |                                                                                                                                 |                                                                           |                                                         |                                            |                     |      |
| 5                                                                                | 2D MXene/SnS <sub>2</sub> composites for Na-ion battery anode (Wu <i>et al.</i> )                                               | AM: AB: CMC = 80: 10: 10<br>(AM: MX/SnS <sub>2</sub> = 5/1, 10/1 and 2/1) | Unknown                                                 | SnS <sub>2</sub> size: 20–25 nm            | Unknown             | 43   |
| <b>GaS (1C = 1107 mA g<sup>-1</sup>)</b>                                         |                                                                                                                                 |                                                                           |                                                         |                                            |                     |      |
| 6                                                                                | 2D Gallium Chalcogenide Nanosheet/CNT composites (Zhang <i>et al.</i> )                                                         | Different mass fractions of CNTs (SWCNT : 5%, 10%, 20%, 30%, and 50%)     | 2 mg cm <sup>-2</sup>                                   | GaS NS size: 338 nm                        | 5 μm                | 23   |

| <b>NaCrO<sub>2</sub> (1C = 110 mA g<sup>-1</sup>)</b><br><b>Theoretical density: 4.36 g cm<sup>-3</sup></b> |                                                                                                              |                                                                                                                        |                                                        |                                                                                                                                                |         |    |
|-------------------------------------------------------------------------------------------------------------|--------------------------------------------------------------------------------------------------------------|------------------------------------------------------------------------------------------------------------------------|--------------------------------------------------------|------------------------------------------------------------------------------------------------------------------------------------------------|---------|----|
| 7                                                                                                           | Layered O <sub>3</sub> -type carbon-coated NaCrO <sub>2</sub> cathode for Na-ion battery (Yu <i>et al.</i> ) | AM: KS-6: Super P: PVDF = 85: 3.75: 3.75: 7.5<br>All samples with x wt% carbon coating (0<x<16.6%)+7.5 % (KS-6+superP) | 4.1 mg cm <sup>-2</sup> (AM: 3.5 mg cm <sup>-2</sup> ) | particle size: ≈ 500 nm                                                                                                                        | ≈ 20 μm | 31 |
| <b>Li<sub>4</sub>Ti<sub>5</sub>O<sub>12</sub> (1C = 175 mA g<sup>-1</sup>)</b>                              |                                                                                                              |                                                                                                                        |                                                        |                                                                                                                                                |         |    |
| 8                                                                                                           | Li <sub>4</sub> Ti <sub>5</sub> O <sub>12</sub> /Graphene anodes for Li-ion batteries                        | PVDF=10 wt% (fixed )<br>Graphene contents varying from 0 to 10 wt%                                                     | Unknown                                                | LTO rods: 1–2 μm length<br>GNS thickness: ≈ 4.5 nm<br>GNS diameter: ≈ 46 nm                                                                    | Unknown | 44 |
| <b>LiCoO<sub>2</sub> (1C = 140 mA g<sup>-1</sup>)</b>                                                       |                                                                                                              |                                                                                                                        |                                                        |                                                                                                                                                |         |    |
| 9                                                                                                           | LiCoO <sub>2</sub> /Graphene/Super P based Li-ion batteries                                                  | Different contents of graphene nanosheet (GN) together with Super-P (SP).<br>No information about binder               | Electrode: 10 mg cm <sup>-2</sup>                      | LCO particle size: 5–10 μm                                                                                                                     | ≈ 50 μm | 45 |
| <b>LiFePO<sub>4</sub> (1C = 170 mA g<sup>-1</sup>)</b>                                                      |                                                                                                              |                                                                                                                        |                                                        |                                                                                                                                                |         |    |
| 10                                                                                                          | LiFePO <sub>4</sub> /Graphene cathode for Li-ion batteries                                                   | 1% GN + 9% SP.<br>No information about binder                                                                          | Unknown                                                | LiFePO <sub>4</sub> microparticle: 400–600 nm<br>Single-layer + multi-layer GNS (3–15 layer)<br>GN1: 1–2 μm;<br>GN2: 3–5 μm;<br>GN3: 10–15 μm; | Unknown | 46 |
| <b>NMC111 (1C = 155 mA g<sup>-1</sup>)</b>                                                                  |                                                                                                              |                                                                                                                        |                                                        |                                                                                                                                                |         |    |
| 11                                                                                                          | NMC/graphite/CB cathode for Li-ion batteries                                                                 | AM: CB: PVDF = 92: 4: 4                                                                                                | Unknown                                                | NMC111: 8.9 μm.<br>Carbon black (Super C65): 35 nm.                                                                                            | Unknown | 47 |

**Supplementary Table 6.** Details of electrode parameters in Figure 6.

| Parameters    | Values                                                                                              | Details                                            | Ref.                                                                                                    |           |
|---------------|-----------------------------------------------------------------------------------------------------|----------------------------------------------------|---------------------------------------------------------------------------------------------------------|-----------|
| $\sigma_E$    | Out-of-plane electrode conductivity                                                                 | 10 S m <sup>-1</sup>                               | High enough to remove resistance limitation in the electrode                                            | This work |
| $\sigma_{BL}$ | Bulk liquid conductivity of electrolyte                                                             | 0.5 S m <sup>-1</sup>                              | Midpoint of the literature values<br>( $\sigma_{BL} = 0.1-1$ S m <sup>-1</sup> )                        | 48        |
| $P_E$         | Porosity of electrode                                                                               | 0.5 (50 %)                                         | Typical value from references<br>( $P_E = 0.3-0.6$ )                                                    | 2,20,22   |
| $P_S$         | Porosity of separator                                                                               | 0.4 (40 %)                                         | Typical porosity of the standard Celgard separator<br>( $P_S = 0.35-0.45$ )                             | 49        |
| $L_E$         | Battery electrode thickness                                                                         | 120 $\mu$ m                                        | Typical value for electrode in commercial battery.<br>( $L_E = 100-150$ $\mu$ m)                        | 20        |
| $L_S$         | Battery separator thickness                                                                         | 25 $\mu$ m                                         | Thickness of the standard Celgard separator                                                             | 52        |
| $L_{AM}$      | Active material thickness                                                                           | 100 nm                                             | Equivalent to particle diameter of 600 nm                                                               | 50        |
| $C_{V,eff}$   | Effective volumetric capacitance associated with battery electrode                                  | $2 \times 10^4$ F cm <sup>-3</sup>                 | Roughly in midpoint of the range found from our model<br>( $C_{V,eff} = 10^3-10^5$ F cm <sup>-3</sup> ) | This work |
| $D_{BL}$      | Bulk liquid diffusion coefficient of electrolyte                                                    | $3 \times 10^{-10}$ m <sup>2</sup> s <sup>-1</sup> | Midpoint of the literature values<br>( $D_{BL} = 1-5 \times 10^{-10}$ m <sup>2</sup> s <sup>-1</sup> )  | 51-53     |
| $D_{AM}$      | Li ion diffusion coefficient in the solid active material                                           | $10^{-16}$ m <sup>2</sup> s <sup>-1</sup>          | Typical value from reference.                                                                           | 54        |
| $t_c$         | Characteristic time associated with electrochemical reaction at the electrode/electrolyte interface | 25 s                                               | Within the range of literature values                                                                   | 50        |

## Supplementary Notes

### Supplementary Note 1. Deriving the equation for characteristic time

This parameter is a measure of  $R_T$  so is likely to be controlled by physical properties of the electrode. This data outlined above implies that  $\tau$  has both resistance and diffusive contributions. In addition, we must include the effects of the kinetics of the electrochemical reaction at the electrode/electrolyte interface. This can be done *via* the characteristic time associated with the reaction,  $t_c$ , which is primarily controlled by the exchange current density *via* the Butler-Volmer equation.<sup>50</sup> This characteristic time can range from  $\sim 0.1$  to  $>100$  s, depending on the circumstances.<sup>50</sup>

Then,  $\tau$  is the sum of the three contributing factors:

$$\tau = \tau_{\text{Electrical}} + \tau_{\text{Diffusive}} + t_c \quad (5A)$$

It is likely that that the diffusive component is just the sum of diffusion times associated with *cation* transport in the electrolyte, both within the separator (coefficient  $D_S$ ) and the electrolyte-filled pores within the electrode (coefficient  $D_P$ ) as well as in the solid active material (coefficient  $D_{AM}$ ).<sup>50</sup> These times can be estimated using  $L = \sqrt{Dt}$  such that

$$\tau_{\text{Diffusive}} = \frac{L_E^2}{D_P} + \frac{L_S^2}{D_S} + \frac{L_{AM}^2}{D_{AM}} \quad (5B)$$

where  $L_E$ ,  $L_S$  and  $L_{AM}$  are the electrode thickness, separator thickness and the length scale associated with active material particles respectively. We note that the value of  $L_{AM}$  depends on material geometry. For a thin film of active material,  $L_{AM}$  is the film thickness while for a quasi-spherical particle of radius  $r$ ,<sup>50</sup>  $L_{AM}=r/3$ .

For the electrical contribution, we note that every battery electrode has an associated *capacitance*<sup>55</sup> which limits the rate at which the electrode can be charged/discharged. This effective capacitance,  $C_{\text{eff}}$ , will be dominated by charge storage but may also have contributions due to surface or polarisation effects.<sup>55</sup> Then, we propose  $\tau_{\text{Electrical}}$  to be the RC time constant associated with the circuit. The total resistance related to the charge/discharge process is the sum of the resistances due to out-of-plane electron transport in the electrode material ( $R_{E,E}$ ), as well as ion transport, both in the electrolyte-filled pores of the electrode ( $R_{I,P}$ ) and in the separator respectively ( $R_{I,S}$ ). Then, the RC contribution to  $\tau$  is given by

$$\tau_{\text{Electrical}} = C_{\text{eff}}(R_{E,E} + R_{I,P} + R_{I,S}) \quad (5C)$$

The overall characteristic time associated with charge/discharge is then the sum of capacitive and diffusive components and  $t_c$ :

$$\tau = C_{\text{eff}}(R_{E,E} + R_{I,P} + R_{I,S}) + \frac{L_E^2}{D_P} + \frac{L_S^2}{D_S} + \frac{L_{AM}^2}{D_{AM}} + t_c \quad (5D)$$

In porous structures, only a fraction of the total volume is available for transport, thus reducing the diffusion coefficient relative to that in the bulk liquid ( $D_{BL}$ ). This is dealt with *via* the Bruggeman equation which says:  $D_{\text{porous}} = D_{BL}P / \tau$  where P is porosity and tau is tortuosity.

This is usually simplified *via* the approximation  $\tau = P^{-1/2}$  so  $D_{\text{porous}} = D_{BL}P^{3/2}$ . We apply this approach to relate the diffusion coefficients of ions in the separator and porous electrode ( $D_S$  and  $D_P$ ) to that in bulk liquid:  $D_P = D_{BL}P_E^{3/2}$  and  $D_S = D_{BL}P_S^{3/2}$ . Here,  $P_E$  and  $P_S$  represent the porosity of the electrode and separator respectively.

We can generalise this approach to apply to ionic conductivity because the Nernst-Einstein predicts a linear relationship between ionic conductivity and the diffusion coefficient. Then,

$$\text{we can write the resistances as } R_{E,M} = \frac{L_E / 2}{\sigma_E A}, R_{I,P} = \frac{L_E / 2}{\sigma_{BL} P_E^{3/2} A} \text{ and } R_{I,S} = \frac{L_S}{\sigma_{BL} P_S^{3/2} A}, \text{ where}$$

$\sigma_{BL}$  is the conductivity of the bulk liquid electrolyte and A is the area of both the electrode and separator. The factor of 2 comes from that fact that, on average, ions from the electrolyte and electrons from the current collector meet at the midpoint of the electrode. Combining these expressions then gives

$$\tau = \frac{C_{\text{eff}}}{A} \left[ \frac{L_E}{2\sigma_E} + \frac{L_E}{2\sigma_{BL} P_E^{3/2}} + \frac{L_S}{\sigma_{BL} P_S^{3/2}} \right] + \frac{L_E^2}{D_{BL} P_E^{3/2}} + \frac{L_S^2}{D_{BL} P_S^{3/2}} + \frac{L_S^2}{D_S} + t_c$$

The effective capacitance of the electrode probably scales with electrode thickness (constant volumetric capacitance,  $C_{\text{eff}} / AL_E = C_{V,\text{eff}}$ ) so

$$\tau = C_{V,\text{eff}} \left[ \frac{L_E^2}{2\sigma_E} + \frac{L_E^2}{2\sigma_{BL} P_E^{3/2}} + \frac{L_E L_S}{\sigma_{BL} P_S^{3/2}} \right] + \frac{L_E^2}{D_{BL} P_E^{3/2}} + \frac{L_S^2}{D_{BL} P_S^{3/2}} + \frac{L_{AM}^2}{D_{AM}} + t_c$$

Which can be rearranged as

$$\tau = L_E^2 \left[ \frac{C_{V,\text{eff}}}{2\sigma_E} + \frac{C_{V,\text{eff}}}{2\sigma_{BL} P_E^{3/2}} + \frac{1}{D_{BL} P_E^{3/2}} \right] + L_E \left[ \frac{L_S C_{V,\text{eff}}}{\sigma_{BL} P_S^{3/2}} \right] + \left[ \frac{L_S^2}{D_{BL} P_S^{3/2}} + \frac{L_{AM}^2}{D_{AM}} \right] + t_c$$

Or alternatively, keeping electrical and diffusive terms together and writing as  $\Theta$ :

$$\Theta^{-1} = \frac{\tau}{L_E^2} = C_{V,eff} \left[ \frac{1}{2\sigma_E} + \frac{1}{2\sigma_{BL}P_E^{3/2}} + \frac{L_S / L_E}{\sigma_{BL}P_S^{3/2}} \right] + \left[ \frac{1}{D_{BL}P_E^{3/2}} + \frac{L_S^2 / L_E^2}{D_{BL}P_S^{3/2}} + \frac{L_{AM}^2 / L_E^2}{D_{AM}} \right] + \frac{t_c}{L_E^2}$$



## Supplementary Note 2. Calculating Percolation Parameters

The data in figure 3E is described by

$$\tau / L_E^2 = \frac{C_{V,eff} / 2}{\sigma_M + \sigma_0 (M_f)^s} + \beta_1$$

For fitting purposes, this can be written as

$$\tau / L_E^2 = \frac{(C_{eff} / V) / 2\sigma_M}{1 + (\sigma_0 / \sigma_M)(M_f)^s} + \beta_1$$

From the fits in figure 3E and figure 5A, we obtain the parameters  $(C_{eff} / V) / 2\sigma_M$ ,  $\sigma_0 / \sigma_M$ ,  $s$  and  $\beta_1$  as shown in table 1. The mean volumetric capacity,  $Q_v$ , can be found by multiplying  $Q_M$  by the electrode density which can usually be extracted/estimated from data in papers. The effective volumetric capacitance was found from  $C_{V,eff} = 28 \times \rho_E C_M$  (figure 4F). This parameter can be combined with the fit parameters to yield  $\sigma_M$  and  $\sigma_0$  (Supplementary Table 1).

The percolation exponents found ranged from 1.4 to 3.5 in good agreement with the fact that in the literature, such exponents usually fall in the range  $1.4 < s < 4$ .<sup>56</sup> The  $\sigma_M$  parameter is a measure of the out-of-plane conductivity of the electrode in the absence of conductive additive. This parameter should be quite small, usually  $\ll 1 \text{ S m}^{-1}$  as is found below. We note that the Yu paper has a higher value of  $\sigma_M = 0.18 \text{ S m}^{-1}$ . This is as expected because the active particles making up the electrode were coated with a conductive carbon coating yielding some conductivity even in the absence of additional filler. The parameter  $\sigma_0$  is roughly a measure of the out-of-plane conductivity of a network containing only the filler particles which we expect to be  $\sim 1000x$  lower than the in plane conductivity.  $\sigma_0$  can be quite high, perhaps reaching  $\sim 10^6 \text{ S m}^{-1}$  for graphite.<sup>57</sup> Thus, the value obtained for Yu *et al* appears plausible while the value obtained from B Zhang's paper is reasonably consistent with their in-plane conductivity which implies a value of  $\sigma_0$  somewhat larger than  $10^6 \text{ S m}^{-1}$ . Notable, the values of  $\sigma_0$  found for J Zhang and J Coelho's work are very low. These papers describe electrodes with carbon nanotubes added to increase conductivity. One might expect NTs to give very good conductivity enhancements and so large values of  $\sigma_0$ . However, in composites prepared by liquid processing, nanotube tend to become aligned in-plane. This can give very low out-of-

plane conductivities. For example, we previously reported an out-of-plane  $\sigma_0$  value of  $4 \text{ S m}^{-1}$  for a composite of single walled nanotubes mixed with  $\text{Co(OH)}_2$  nanosheets.<sup>58</sup> This data implies that nanotubes may not be as good at enhancing rate as may have been thought.

### Supplementary Note 3. Main text Fig 5 Calculations

#### Figure 5B

Bauer *et al*: Characteristic time *versus* porosity.

$$\text{Equation: } \frac{\tau}{L_E^2} = \left[ \frac{C_{V,eff}}{2\sigma_{BL}} + \frac{1}{D_{BL}} \right] P_E^{-3/2} + \beta_2$$

$$\text{Fit equation: } \frac{\tau}{L_E^2} = 1.27e10 * P^{(-3/2)} + 9.8e8$$

From the fit, the square-bracketed term =  $1.27 \times 10^{10} \text{ s m}^{-2}$ . Personal communication from the author showed the electrodes to have  $L_E = 62$  and  $77 \text{ }\mu\text{m}$  for the low- and high-P samples respectively. The volumetric capacities ( $Q_V$ ) were  $\sim 3 \times 10^8 \text{ mAh m}^{-3}$ . Using the relationship in figure 4F ( $C_{V,eff} = 28 \times Q_V$ ) gives  $C_{V,eff} = 8.4 \times 10^9 \text{ F m}^{-3}$ . Then approximating  $D_{BL} \approx 3 \times 10^{-10} \text{ m}^2 \text{ s}^{-1}$  yields  $\sigma_{BL} = 0.45 \text{ S m}^{-1}$ . As typical electrolytes used in LiBs ( $c = 1 \text{ M}$ ) typically have  $\sigma_{BL} \sim 0.5 - 1 \text{ S m}^{-1}$ , this is as expected.

#### Figure 5C

Yu *et al*: Characteristic time *versus* electrolyte concentration

$$\text{Equation: } \frac{\tau}{L_E^2} = \left[ \frac{C_{V,eff}}{2\sigma_E} + \frac{1}{D_{BL} P_E^{3/2}} \right] + \frac{t^+ RT}{F^2 D_{BL} c} \left[ \frac{C_{V,eff}}{2 P_E^{3/2}} + \frac{L_S}{L_E} \frac{C_{V,eff}}{P_S^{3/2}} \right]$$

$$\text{Fit equation; } \frac{\tau}{L_E^2} = 1.6e10 + 9.1e13/c \text{ (c in mol m}^{-3}\text{)}$$

The volumetric capacities were  $\sim 3.6 \times 10^8 \text{ mAh m}^{-3}$ . Using the relationship in figure 4F ( $C_{V,eff} = 28 \times Q_V$ ) gives  $C_{V,eff} = 10.1 \times 10^9 \text{ F m}^{-3}$ .

Then approximating  $t^+ \approx 1$ ,  $P_S \approx 0.4$ ,  $P_E \sim 0.4$  (estimated from paper =  $1 - (2.2 \text{ g cc}^{-1}) / (3.6 \text{ g cc}^{-1})$ ) and taking  $D_{BL} \approx 10^{-10} \text{ m}^2 \text{ s}^{-1}$  and using the slope yields  $L_S / L_E = 0.35$ . Assuming,  $L_S = 25 \text{ }\mu\text{m}$ , yields  $L_E = 71 \text{ }\mu\text{m}$ , close to the quoted value of  $65 \text{ }\mu\text{m}$ .

#### Figure 5D

This work: Characteristic time *versus* electrolyte (separator) thickness.

$$\text{Equation: } \frac{\tau}{L_E^2} = L_S \left[ \frac{C_{V,eff}}{L_E \sigma_{BL} P_S^{3/2}} \right] + \beta_3$$

Fit:  $2.04 \times 10^{10} + 2.71 \times 10^{14} * L_S$

The volumetric capacities were  $\sim 3.3 \times 10^8$  mAh m<sup>-3</sup>. Using the relationship in figure 4F ( $C_{V,eff} = 28 \times Q_V$ ) gives  $C_{V,eff} = 9.2 \times 10^9$  F m<sup>-3</sup>.

Then approximating  $D_{BL} \approx 3 \times 10^{-10}$  m<sup>2</sup> s<sup>-1</sup> and  $P_S \sim 0.4$  and taking the measured value of  $L_E = 245$  μm gives  $\sigma_{BL} \sim 0.6$  S m<sup>-1</sup>.

### Figure 5E

Ye *et al*: characteristic time versus thickness of thin active layer in porous current collector (large pores)

$$\text{Equation: } \tau = \frac{L_{AM}^2}{D_{AM}} + \beta_4$$

From the fit  $1/D_{AM} = 3.02 \times 10^{18}$  s m<sup>-2</sup> yielding  $D_{AM} = 3.3 \times 10^{-19}$  m<sup>2</sup> s<sup>-1</sup>.

## Supplementary Methods

### **Electrode fabrication and electrochemical characterization performed in this work**

As shown in figure 4 and 5D (main text), some electrodes were prepared and tested in this work. All such electrodes were prepared by a conventional slurry casting method using a CNT solution (Tuball, OCSiAl, 0.2 wt% SWCNT in water with ~0.2 wt% PVP as a surfactant) with various battery active materials (AM). Here we employed nano-LTO (~200 nm, Aldrich), micro-sized silicon (1–3  $\mu\text{m}$ , US Research Nanomaterials), and graphene wrapped silicon (Si/Gr, Nano GCA-2000, Angstrom Materials) for anodes, and NMC (NMC811, ~10  $\mu\text{m}$ , Li-fun Tech) for cathodes, respectively. The AM powers were directly mixed with the CNT solution and ground by a mortar and pestle to obtain a uniform slurry. The CNT contents and electrode compositions were controlled by changing the mixing ratio between CNT solution and AM power. For instance, 1 g of AM powder was mixed with 2.5 ml of CNT solution to fabricate 0.5 wt% CNT-AM electrode. Then the slurry was cast onto either Al or Cu foil using a doctor blade. The electrode thickness was also controlled by the slurry coating thickness with changing the height of the doctor blade. Then the slurry cast electrodes were slowly dried at 40 °C for 2 hours and followed by vacuum drying at 100 °C for 12 hours to remove residual water.

The electrochemical properties of the electrodes were measured in 2032-type coin cells (MTI Corp.) with a half-cell configuration. All coin cells were assembled in an Ar-filled glovebox (UNIlab Pro, Mbraun). The dried electrodes were cut into 12 mm diameter discs (area = 1.13  $\text{cm}^2$ ) and paired with Li metal discs (diameter= 16 mm). Celgard 2032 (thickness = 25  $\mu\text{m}$ ) was used as a separator. To investigate the effect of separator thickness, we also varied the number of stacked separators (1–3 stacks, thickness varying from 25–75  $\mu\text{m}$ ). The electrolyte was 1–1.2 M  $\text{LiPF}_6$  dissolved in EC/DEC/FEC (3:6:1 in v/v/v, BASF) with 2 wt% vinylene carbonate. The rate-capabilities were evaluated by galvanostatic charge-discharge (GCD) test at a potentiostat (VMP3, Biologic). The voltage range was 0.005–1.2 V, 1–2.5 V and 3–4.3 V for Si, LTO, and NMC electrodes, respectively.

### **Capacity-rate analysis in this work**

#### **Note on fitting**

All the fitting analysis has been performed by Origin software (here we used Origin version 2015-2018) using “Nonlinear Curve Fit” function, according to the model equation.

Although it seems obvious that the best way to fit data is to plot  $Q/M$  v  $R$  and use  $\frac{Q}{M} = Q_M \left[ 1 - (R\tau)^n \left( 1 - e^{-(R\tau)^{-n}} \right) \right]$  to fit, this is not the case. The reason is that in some cases, the  $Q/M$  data can span a wide range. Then the least squares fitting routine is biased toward the larger values of  $Q/M$  leading to poor fits at high  $R$ .

To avoid this, we plotted the data as  $\log(Q/M)$  vs.  $R$  and fitted using  $\log(Q/M) = \log \left\{ Q_M \left[ 1 - (R\tau)^n \left( 1 - e^{-(R\tau)^{-n}} \right) \right] \right\}$

The resultant smaller range of y-values results in much better fitting.

## Supplementary References

1. Yang, C.F., Zhang, X.S., Huang, M.Y., Huang, J.J. & Fang, Z.B. Preparation and Rate Capability of Carbon Coated LiNi<sub>1/3</sub>Co<sub>1/3</sub>Mn<sub>1/3</sub>O<sub>2</sub> as Cathode Material in Lithium Ion Batteries. *Acs Appl Mater Inter* **9**, 12408-12415 (2017).
2. Zheng, H.H., Li, J., Song, X.Y., Liu, G. & Battaglia, V.S. A comprehensive understanding of electrode thickness effects on the electrochemical performances of Li-ion battery cathodes. *Electrochim Acta* **71**, 258-265 (2012).
3. Singh, M., Kaiser, J. & Hahn, H. A systematic study of thick electrodes for high energy lithium ion batteries. *J Electroanal Chem* **782**, 245-249 (2016).
4. Kim, J.M., Park, C.H., Wu, Q.L. & Lee, S.Y. 1D Building Blocks-Intermingled Heteronanomats as a Platform Architecture For High-Performance Ultrahigh-Capacity Lithium-Ion Battery Cathodes. *Adv Energy Mater* **6**, 1501594 (2016).
5. Gaikwad, A.M. *et al.* A High Areal Capacity Flexible Lithium-Ion Battery with a Strain-Compliant Design. *Adv Energy Mater* **5**, 1401389 (2015).
6. Lai, W. *et al.* Ultrahigh-Energy-Density Microbatteries Enabled by New Electrode Architecture and Micropackaging Design. *Adv Mater* **22**, E139-E144 (2010).
7. Cho, S.J. *et al.* Hetero-Nanonet Rechargeable Paper Batteries: Toward Ultrahigh Energy Density and Origami Foldability. *Adv Funct Mater* **25**, 6029-6040 (2015).
8. Ren, W.J. *et al.* Soft-contact conductive carbon enabling depolarization of LiFePO<sub>4</sub> cathodes to enhance both capacity and rate performances of lithium ion batteries. *J Power Sources* **331**, 232-239 (2016).
9. Lou, X.M. & Zhang, Y.X. Synthesis of LiFePO<sub>4</sub>/C cathode materials with both high-rate capability and high tap density for lithium-ion batteries. *J Mater Chem* **21**, 4156-4160 (2011).
10. Yang, G.F., Song, K.Y. & Joo, S.K. Ultra-thick Li-ion battery electrodes using different cell size of metal foam current collectors. *Rsc Adv* **5**, 16702-16706 (2015).
11. Shao, D., Zhong, H.X. & Zhang, L.Z. Water-Soluble Conductive Composite Binder Containing PEDOT: PSS as Conduction Promoting Agent for Si Anode of Lithium-Ion Batteries. *Chemelectrochem* **1**, 1679-1687 (2014).
12. Leveau, L. *et al.* Silicon nano-trees as high areal capacity anodes for lithium-ion batteries. *J Power Sources* **316**, 1-7 (2016).
13. Zhou, M. *et al.* High-Performance Silicon Battery Anodes Enabled by Engineering Graphene Assemblies. *Nano Lett* **15**, 6222-6228 (2015).
14. Salvatierra, R.V. *et al.* Silicon Nanowires and Lithium Cobalt Oxide Nanowires in Graphene Nanoribbon Papers for Full Lithium Ion Battery. *Adv Energy Mater* **6**, 1600918 (2016).
15. Bourgeois, J.P., Vlad, A., Melinte, S. & Gohy, J.F. Design of Flexible and Self-Standing Electrodes for Li-Ion Batteries. *Chinese J Chem* **35**, 41-47 (2017).
16. Ge, H. *et al.* Unique mesoporous spinel Li<sub>4</sub>Ti<sub>5</sub>O<sub>12</sub> nanosheets as anode materials for lithium-ion batteries. *Journal of Power Sources* **297**, 436-441 (2015).
17. Wang, Y.Q. *et al.* Rutile-TiO<sub>2</sub> Nanocoating for a High-Rate Li<sub>4</sub>Ti<sub>5</sub>O<sub>12</sub> Anode of a Lithium-Ion Battery. *J Am Chem Soc* **134**, 7874-7879 (2012).
18. Billaud, J., Bouville, F., Magrini, T., Villevieille, C. & Studart, A.R. Magnetically aligned graphite electrodes for high-rate performance Li-ion batteries. *Nat Energy* **1**, 16097 (2016).
19. Han, Y.J. *et al.* Coating of graphite anode with coal tar pitch as an effective precursor for enhancing the rate performance in Li-ion batteries: Effects of composition and softening points of coal tar pitch. *Carbon* **94**, 432-438 (2015).

20. Gallagher, K.G. *et al.* Optimizing Areal Capacities through Understanding the Limitations of Lithium-Ion Electrodes. *J Electrochem Soc* **163**, A138-A149 (2016).
21. Sun, H.T. *et al.* Three-dimensional holey-graphene/niobia composite architectures for ultrahigh-rate energy storage. *Science* **356**, 599-604 (2017).
22. Yu, D.Y.W., Donoue, K., Inoue, T., Fujimoto, M. & Fujitani, S. Effect of electrode parameters on LiFePO<sub>4</sub> cathodes. *J Electrochem Soc* **153**, A835-A839 (2006).
23. Zhang, C.F. *et al.* Enabling Flexible Heterostructures for Li-Ion Battery Anodes Based on Nanotube and Liquid-Phase Exfoliated 2D Gallium Chalcogenide Nanosheet Colloidal Solutions. *Small* **13**, 1701677 (2017).
24. He, X. *et al.* Durable high-rate capability Na<sub>0.44</sub>MnO<sub>2</sub> cathode material for sodium-ion batteries. *Nano Energy* **27**, 602-610 (2016).
25. Song, H.J., Kim, D.S., Kim, J.C., Hong, S.H. & Kim, D.W. An approach to flexible Na-ion batteries with exceptional rate capability and long lifespan using Na<sub>2</sub>FeP<sub>2</sub>O<sub>7</sub> nanoparticles on porous carbon cloth. *Journal of Materials Chemistry A* **5**, 5502-5510 (2017).
26. Ko, J.S. *et al.* High-rate capability of Na<sub>2</sub>FePO<sub>4</sub>F nanoparticles by enhancing surface carbon functionality for Na-ion batteries. *Journal of Materials Chemistry A* **5**, 18707-18715 (2017).
27. Wang, D.X. *et al.* Sodium vanadium titanium phosphate electrode for symmetric sodium-ion batteries with high power and long lifespan. *Nature Communications* **8**, 15888 (2017).
28. Zhu, C.B., Song, K.P., van Aken, P.A., Maier, J. & Yu, Y. Carbon-Coated Na<sub>3</sub>V<sub>2</sub>(PO<sub>4</sub>)<sub>3</sub> Embedded in Porous Carbon Matrix: An Ultrafast Na-Storage Cathode with the Potential of Outperforming Li Cathodes. *Nano Letters* **14**, 2175-2180 (2014).
29. Fang, Y.J., Xiao, L.F., Ai, X.P., Cao, Y.L. & Yang, H.X. Hierarchical Carbon Framework Wrapped Na<sub>3</sub>V<sub>2</sub>(PO<sub>4</sub>)<sub>3</sub> as a Superior High-Rate and Extended Lifespan Cathode for Sodium-Ion Batteries. *Advanced Materials* **27**, 5895-5900 (2015).
30. Xu, Y.A. *et al.* Layer-by-Layer Na<sub>3</sub>V<sub>2</sub>(PO<sub>4</sub>)<sub>3</sub> Embedded in Reduced Graphene Oxide as Superior Rate and Ultralong-Life Sodium-Ion Battery Cathode. *Advanced Energy Materials* **6**, 1600389 (2016).
31. Yu, C.Y. *et al.* NaCrO<sub>2</sub> cathode for high-rate sodium-ion batteries. *Energ Environ Sci* **8**, 2019-2026 (2015).
32. Fang, Y.J. *et al.* Mesoporous Amorphous FePO<sub>4</sub> Nanospheres as High-Performance Cathode Material for Sodium-Ion Batteries. *Nano Letters* **14**, 3539-3543 (2014).
33. Tahir, M.N. *et al.* Extraordinary Performance of Carbon-Coated Anatase TiO<sub>2</sub> as Sodium-Ion Anode. *Advanced Energy Materials* **6**, 1501489 (2016).
34. Luo, W. *et al.* Low-Surface-Area Hard Carbon Anode for Na-Ion Batteries via Graphene Oxide as a Dehydration Agent. *Acs Applied Materials & Interfaces* **7**, 2626-2631 (2015).
35. Wen, Y. *et al.* Expanded graphite as superior anode for sodium-ion batteries. *Nature Communications* **5**, 4033 (2014).
36. Kim, H. *et al.* Sodium Storage Behavior in Natural Graphite using Ether-based Electrolyte Systems. *Advanced Functional Materials* **25**, 534-541 (2015).
37. He, M., Kraychyk, K., Walter, M. & Kovalenko, M.V. Monodisperse Antimony Nanocrystals for High-Rate Li-ion and Na-ion Battery Anodes: Nano versus Bulk. *Nano Letters* **14**, 1255-1262 (2014).
38. Fan, L. *et al.* Electrochemical performance of rod-like Sb-C composite as anodes for Li-ion and Na-ion batteries. *Journal of Materials Chemistry A* **3**, 3276-3280 (2015).
39. Coelho, J. *et al.* Lithium Titanate/Carbon Nanotubes Composites Processed by Ultrasound Irradiation as Anodes for Lithium Ion Batteries. *Sci Rep* **7**, 7614 (2017).



40. Zheng, M. *et al.* MoS<sub>2</sub> intercalated p-Ti<sub>3</sub>C<sub>2</sub> anode materials with sandwich-like three dimensional conductive networks for lithium-ion batteries. *J Alloy Compd* **735**, 1262-1270 (2018).
41. Yin, Z. *et al.* Copper nanowire/multi-walled carbon nanotube composites as all-nanowire flexible electrode for fast-charging/discharging lithium-ion battery. *Nano Res* **11**, 769-779 (2018).
42. Wang, L. *et al.* Carbon nanotube decorated NaTi<sub>2</sub>(PO<sub>4</sub>)<sub>3</sub>/C nanocomposite for a high-rate and low-temperature sodium-ion battery anode. *Rsc Adv* **6**, 70277-70283 (2016).
43. Wu, Y.T., Nie, P., Wu, L.Y., Dou, H. & Zhang, X.G. 2D MXene/SnS<sub>2</sub> composites as high-performance anodes for sodium ion batteries. *Chem Eng J* **334**, 932-938 (2018).
44. Zhang, B. *et al.* Percolation threshold of graphene nanosheets as conductive additives in Li<sub>4</sub>Ti<sub>5</sub>O<sub>12</sub> anodes of Li-ion batteries. *Nanoscale* **5**, 2100-2106 (2013).
45. Tang, R. *et al.* How a very trace amount of graphene additive works for constructing an efficient conductive network in LiCoO<sub>2</sub>-based lithium-ion batteries. *Carbon* **103**, 356-362 (2016).
46. Liu, T. *et al.* Effects of graphene with different sizes as conductive additives on the electrochemical performance of a LiFePO<sub>4</sub> cathode. *Rsc Adv* **7**, 20882-20887 (2017).
47. Bauer, W., Notzel, D., Wenzel, V. & Nirschl, H. Influence of dry mixing and distribution of conductive additives in cathodes for lithium ion batteries. *J Power Sources* **288**, 359-367 (2015).
48. Logan, E.R. *et al.* A Study of the Physical Properties of Li-Ion Battery Electrolytes Containing Esters. *Journal of The Electrochemical Society* **165**, A21-A30 (2018).
49. Arora, P. & Zhang, Z.M. Battery separators. *Chem Rev* **104**, 4419-4462 (2004).
50. Jiang, F.M. & Peng, P. Elucidating the Performance Limitations of Lithium-ion Batteries due to Species and Charge Transport through Five Characteristic Parameters. *Scientific Reports* **6** (2016).
51. Ehrl, A., Landesfeind, J., Wall, W.A. & Gasteiger, H.A. Determination of Transport Parameters in Liquid Binary Lithium Ion Battery Electrolytes I. Diffusion Coefficient. *Journal of the Electrochemical Society* **164**, A826-A836 (2017).
52. Ong, M.T. *et al.* Lithium Ion Solvation and Diffusion in Bulk Organic Electrolytes from First-Principles and Classical Reactive Molecular Dynamics. *Journal of Physical Chemistry B* **119**, 1535-1545 (2015).
53. Park, M., Zhang, X.C., Chung, M.D., Less, G.B. & Sastry, A.M. A review of conduction phenomena in Li-ion batteries. *J Power Sources* **195**, 7904-7929 (2010).
54. Ding, N. *et al.* Determination of the diffusion coefficient of lithium ions in nano-Si. *Solid State Ion.* **180**, 222-225 (2009).
55. He, H.W., Xiong, R. & Fan, J.X. Evaluation of Lithium-Ion Battery Equivalent Circuit Models for State of Charge Estimation by an Experimental Approach. *Energies* **4**, 582-598 (2011).
56. Bauhofer, W. & Kovacs, J.Z. A review and analysis of electrical percolation in carbon nanotube polymer composites. *Composites Science and Technology* **69**, 1486-1498 (2009).
57. Celzard, A., Mareche, J.F., Furdin, G. & Puricelli, S. Electrical conductivity of anisotropic expanded graphite-based monoliths. *Journal of Physics D-Applied Physics* **33**, 3094-3101 (2000).
58. Ling, Z. *et al.* Quantifying the Role of Nanotubes in Nano:Nano Composite Supercapacitor Electrodes. *Advanced Energy Materials* **8**, 1702364 (2018).
